1

2           **Network supporting contextual fear learning after dorsal hippocampal damage has**  
3                           **increased dependence on retrosplenial cortex**

4

5 Cesar A.O. Coelho<sup>1</sup>, Tatiana L. Ferreira<sup>2</sup>, Juliana C.K. Soares<sup>1</sup>, João R. Sato<sup>2</sup>, Maria Gabriela M.  
6 Oliveira<sup>1\*</sup>.

7 <sup>1</sup> Departamento de Psicobiologia, Universidade Federal de São Paulo - UNIFESP, São Paulo,  
8 SP, Brazil, zipcode 04023064

9 <sup>2</sup> Centro de Matemática, Computação e Cognição, Universidade Federal do ABC, UFABC, São  
10 Bernardo do Campo, SP, Brazil, zipcode 09606070

11

12 \*Corresponding author:

13 [gabriela.oliveira@unifesp.br](mailto:gabriela.oliveira@unifesp.br)

14 Tel: 55 11 2149 0155

15

16 Running title: Network compensating hippocampus in learning

17

18 **Author's contributions**

19 CAOC conceived and designed the study, performed the experiments in all phases, wrote the  
20 computational routines to analyze the data, analyzed the data, prepared the manuscript. TLF  
21 helped in the immunolabelling standardization, anatomical definition of brain regions, interpreting  
22 some results and revised the manuscript. JCKS helped designing the experiments, helped  
23 performing behavioral and perfusion procedures, helped interpreting the data and revised the  
24 manuscript. JRS helped designing the study, writing the computational routines, analyzing the  
25 data, revised the manuscript. MGMO conceived and designed the study, revised the final version  
26 of the manuscript. All authors have read and approved the final version of the manuscript.

27

28 **Acknowledgements**

29 We thank André Fujita, André Cravo and Altay Lino de Souza for valuable comments and insights  
30 during the development of the study.

31

32 **Conflict of interest**

33 The authors declare no competing financial interests.

34

35

36

37

38

39

40

41

42

43

44

45

46

47

48

49

50

51

52

53

54

55

56

57

58

59

60

61 **ABSTRACT**

62

63 Hippocampal damage results in profound retrograde, but no anterograde amnesia in contextual  
64 fear conditioning (CFC). Although the content learned in the latter have been discussed, the  
65 compensating regions were seldom proposed and never empirically addressed. Here, we  
66 employed network analysis of pCREB expression quantified from brain slices of rats with dorsal  
67 hippocampal lesion (dHPC) after undergoing CFC session. Using inter-regional correlations of  
68 pCREB-positive nuclei between brain regions, we modelled functional networks using different  
69 thresholds. The dHPC network showed *small-world* topology, equivalent to SHAM (control)  
70 network. However, diverging hubs were identified in each network. In a direct comparison, hubs  
71 in both networks showed consistently higher centrality values compared to the other network.  
72 Further, the distribution of correlation coefficients was different between the groups, with most  
73 significantly stronger correlation coefficients belonging to the SHAM network. These results  
74 suggest that dHPC network engaged in CFC learning is partially different, and engage alternative  
75 hubs. We next tested if pre-training lesions of dHPC and one of the new dHPC network hubs  
76 (perirhinal, Per; or disgranular retrosplenial, RSC, cortices) would impair CFC. Only dHPC-RSC,  
77 but not dHPC-Per, impaired CFC. Interestingly, only RSC showed a consistently higher centrality  
78 in the dHPC network, suggesting that the increased centrality reflects an increased functional  
79 dependence on RSC. Our results provide evidence that, without hippocampus, the RSC, an  
80 anatomically central region in the medial temporal lobe memory system might support CFC  
81 learning and memory.

82

83

84

85

86

87

88

89

90

91 **AUTHOR SUMMARY**

92

93 When determined cognitive performances are not affected by brain lesions of regions generally  
94 involved in that performance, the interpretation is that the remaining regions can compensate the  
95 damaged one. In contextual fear conditioning, a memory model largely used in laboratory rodents,  
96 hippocampal lesions produce amnesia for events occurred before, but not after the lesion,  
97 although the hippocampus is known to be important for new learning. Addressing compensation  
98 in animal models has always been challenging as it requires large-scale brain mapping. Here, we  
99 quantified 30 brain regions and used mathematical tools to model how a brain network can  
100 compensate hippocampal loss and learn contextual fear. We described that the damaged network  
101 preserved general interactivity characteristics, although different brain regions were identified as  
102 highly important for the network (e.g. highly connected). Further, we empirically validated our  
103 network model by performing double lesions of the hippocampus and the alternative hubs  
104 observed in the network models. We verified that double lesion of the hippocampus and  
105 retrosplenial cortex, one of the hubs, impaired contextual fear learning. We provide evidence that  
106 without hippocampus, the remaining network relies on alternative important regions from the  
107 memory system to coordinate contextual fear learning.

108

109

110

111

112

113

114

115

116

117

118

119

120

121 **INTRODUCTION**

122

123 Lesion studies examine primarily the extent to which the brain can compensate the damaged  
124 region. For instance, a post-lesion impaired behavioral performance means that the remaining  
125 collective brain regions do not compensate the damaged region (Geschwind, 1965; Aggleton,  
126 2008). In contextual fear conditioning (CFC), hippocampal lesions result in profound retrograde  
127 amnesia (of pre-lesion events), but no anterograde amnesia (post-lesion events; Frankland et al.,  
128 1998; Wiltgen et al., 2006), suggesting that new learning is supported by the reminiscent regions.  
129 Evidence for hippocampal participation in CFC acquisition have been provided by manipulations  
130 ranging from pharmacological injections such as muscarinic (Gale et al., 2001) and NMDA  
131 receptors blockade (Schenberg and Oliveira, 2008), to optogenetic approaches (Liu et al., 2012).  
132 Thus, although hippocampus participates in CFC learning if it is functional during acquisition, CFC  
133 learning can occur after hippocampal loss.

134 The hippocampal loss compensation in CFC inspired cognitively-oriented hypotheses about the  
135 content learned by non-hippocampal regions, some proposing a fragmented (elemental) context  
136 representation (Nadel and Willner, 1980; Rudy, 2009), others proposing a still configural  
137 representation (Fanselow, 2010). These hypotheses further propose that hippocampus has  
138 preference over the non-hippocampal regions. This accounts for the impaired CFC observed after  
139 temporary manipulations, during which hippocampus inhibits the non-hippocampal regions while  
140 unable form long-term memory (Fanselow, 2010). However, little attention has been given to the  
141 compensatory regions. Although parahippocampal cortices were pointed out as putative  
142 candidates (Rudy, 2009), the regions involved in hippocampal loss compensation in CFC have  
143 not been empirically addressed. Investigating how these regions learn and store CFC information  
144 can help to understand the dynamics of hippocampal function and its interactions within the  
145 memory systems.

146 There is evidence for a large number of regions to compose the neural circuits involved in CFC  
147 (Fanselow and Poulos, 2005; Maren, 2011) and spatial/contextual memory (Bucci and Robinson,  
148 2014). Understanding compensation of a lesion requires assessing complex interactions among  
149 the remaining regions and their possible changes. Network approaches assess complex brain  
150 interactions based on the representation of elements (i.e. brain regions, neurons) and connection

151 concepts (i.e. projections, functional connectivity), and offer quantitative tools for a data-driven  
152 assessment of network characteristics related to brain structure and function (Bullmore and  
153 Sporns, 2009).

154 Large-scale network studies based on structural and functional MRI data have been paving a  
155 solid ground in cognitive neuroscience (Medaglia et al., 2015; Mišić and Sporns, 2016). They  
156 have explored functional network topology in the brain (Achard et al., 2006) and its importance to  
157 learning (Bassett et al., 2011) and emotion (Kinnison et al., 2012). Network studies have also  
158 been useful in identifying crucial brain regions (hubs) for network function (van den Heuvel and  
159 Sporns, 2013), and to identify functional network changes after traumatic brain injuries (Hillary  
160 and Grafman, 2017) and in psychiatric disorders (Crossley et al., 2016; Sato et al., 2016). Some  
161 studies took advantage of rodent models and employed network analysis in the expression of the  
162 activity-dependent gene *c-fos* after remote CFC retrieval (Wheeler et al., 2013) and later  
163 empirically interrogated the network hubs given by the model (Vetere et al., 2017). Here, we used  
164 a similar rationale to investigate hippocampal compensation in CFC. We used the phosphorylated  
165 cAMP response element binding (pCREB, active form of CREB), which is critical to learning-  
166 induced synaptic plasticity (Alberini, 2009), as our marker of brain region engagement; and  
167 examined activation and coactivation of brain regions of hippocampectomized rats after a CFC  
168 session. Using network analysis, we examined how the compensatory network might support  
169 CFC learning and memory. We hypothesized that different network attributes in the 'damaged  
170 network' could be underlying hippocampal compensation in CFC learning. Further, we performed  
171 double lesions to empirically validate some results that indicated possible models for  
172 compensation of hippocampal loss in CFC (**Figure 1**).

173

## 174 **RESULTS**

175

### 176 **Experiment 1 – Network underlying contextual fear learning in the absence of dHPC**

177 *Experiment 1* aimed to explore how CFC learning under dHPC damage changes other brain  
178 regions activity and interactivity patterns compared to CFC learning in normal rats. We compared  
179 pCREB expression levels between the groups and modelled functional networks based on  
180 pCREB expression correlations. Then we employed network tools to explore differences between

181 damaged and control groups. In *Experiment 1*, the rats initially underwent bilateral electrolytic  
182 lesions in the dHPC or SHAM surgery. After surgical recovery, the rats underwent a CFC training  
183 session. Half the cohort was perfused 3 h after the training session, and their brains processed  
184 for pCREB immunolabelling. The other half was returned to the homecage and tested for  
185 contextual fear memory 48 h later. A group of immediate shock controls (Imm) was added to the  
186 cohort that was tested for contextual fear memory.

187

### 188 ***dHPC damage does not alter CFC memory***

189 The histological examination of dHPC lesions revealed that the cellular loss was overall confined  
190 to the dorsal part of the hippocampus, with occasional lesion to the overlying cortex due to the  
191 electrode insertion (**Figure 3a**). The cohort tested for contextual memory had the freezing  
192 behavior measured as memory index, and was compared among the groups. The sample size in  
193 the memory test cohort was 32 (SHAM: N = 12; dHPC: N = 12; Imm: N = 8). A bootstrapped one-  
194 way ANOVA showed a significant group effect ( $F_{2,29} = 8.822$ ,  $p = 0.0011$ ). Multiple comparisons  
195 performed with p-corrected t-tests showed higher freezing time in both SHAM ( $p = 0.0001$ ) and  
196 dHPC ( $p = 0.0178$ ) groups compared to Imm group, but not statistically different from one another  
197 ( $p = 0.4044$ ; **Figure 3b**). A KS test confirmed these results, showing no difference between SHAM  
198 and dHPC samples ( $D_{24} = 0.3333$ ,  $p = 0.2212$ ) and both different from Imm group sample (SHAM:  
199  $D_{20} = 0.917$ ,  $p = 0.0001$ ; dHPC:  $D_{20} = 0.667$ ,  $p = 0.0070$ ; **Figure 3c**). A Cohen's d showed a  
200 medium effect size between SHAM and dHPC means ( $d = 0.630$ ) and large effect sizes between  
201 these two groups and Imm (SHAM:  $d = 2.226$ ; dHPC:  $d = 1.275$ ). These results show no effect of  
202 dHPC lesion in CFC learning and are in agreement with past studies (Wiltgen et al., 2006).

203

### 204 ***dHPC damage does not alter the overall pCREB levels in the quantified regions***

205 In the pCREB immunolabelling cohort, we tested whether the dHPC lesion altered pCREB  
206 expression after CFC learning in any of the studied regions by comparing the pCREB expression  
207 in each region between dHPC and SHAM groups. The **Figure 3d** shows the pCREB expression  
208 in each region and each group. The sample size in the pCREB expression cohort was 19 (SHAM:  
209 N = 9; dHPC: N = 10). A visual inspection of the pCREB data reveals an expression roughly  
210 similar to previous studies (Stanciu et al., 2001; Trifilieff et al., 2006). We analyzed the pCREB-

211 positive nuclei density by comparing each region between the groups using t-tests with bootstrap  
212 resampling. There was only one marginally significant difference showing a higher level in the  
213 SHAM group in the vSub ( $t = 3.699$ ,  $\text{fdr-corrected } p = 0.053$ ). All other regions did not present a  
214 significant difference. This result indicates that dHPC damage diminish the pCREB expression in  
215 the vSUB, but otherwise does not alter the overall pCREB-positive nuclei density compared to  
216 the SHAM group.

217

### 218 ***Functional Networks***

219 We used the pCREB data to generate correlation-based networks for the SHAM and dHPC  
220 groups. As the SHAM groups has three regions absent in the dHPC group (dCA1, dCA3 and  
221 dDG), a third network was generated as “SHAM with no dorsal hippocampus”, SHAM-nH, to allow  
222 for direct comparisons between the networks (**Figure 4**). For each matrix, three networks were  
223 generated considering correlations with p-values under the threshold of 0.05, 0.025 or 0.01,  
224 respectively. The networks had a very similar connectivity density that, as expected, linearly  
225 decreased as the thresholds increased in rigor (SHAM networks had 92, 64 and 40 edges  
226 respectively, SHAM-nH had 74, 53 and 35 edges, and dHPC had 77, 53 and 32 edges). In all  
227 thresholds, the networks had one big connected component and 3-5 disconnected regions in the  
228 most stringent threshold (0.01). Although in our study negative correlations were included as  
229 absolute values in the edge weights, no negative correlations survived the thresholds. Overall,  
230 the networks presented some visual differences in their pattern of connectivity, which we formally  
231 tested in the analyses that follow.

232

### 233 ***dHPC damage did not alter small-worldness of the CFC learning network***

234 We first tested whether the empirical networks (SHAM, SHAM-nH and dHPC) were small-world  
235 by comparing their global (Geff) and local (Leff) efficiencies to those of randomized null hypothesis  
236 networks. The **Figure 5** depicts the distribution of the empirical/randomized ratios of Geff and  
237 mean Leff for all networks and thresholds. In all cases, Geff ratios are roughly around 1, with a  
238 slight decay on the 0.01 threshold. Similarly, the mean Leff ratios are consistently above 1, with  
239 the mean and upper range of ratios increasing and the threshold increases in rigor. Equivalent  
240 integration (Geff) and robustly higher segregation (Leff) values in empirical networks compared



241 to randomized networks is consistent with small-world networks accounts (Watts and Strogatz,  
242 1998; Latora and Marchiori, 2001). These results suggest that the networks engaged in CFC  
243 learning are small-world, which is in agreement with a previous work showing small-world  
244 organization in CFC retrieval networks (Wheeler et al., 2013). Further, dHPC lesion did not seem  
245 to change the dHPC network small-worldness or its levels of Geff and mean Leff compared to the  
246 other networks, suggesting that the overall characteristic interactivity in the network was not  
247 affected.

248

#### 249 ***dHPC network has alternative hubs***

250 Hubs are defined as nodes positioned to confer the largest contributions to global network  
251 function, and are usually identified using multiple centrality metrics (van den Heuvel and Sporns,  
252 2013). We considered as hub any region among the 25% most central regions in at least three of the four  
253 centrality metrics used (weighted degree, Wdg; eigenvector, Evc; closeness, Clo; and betweenness, Bet).  
254 Regions that were hubs across all thresholds were considered stable hubs. The **Figure 6a-b** shows the  
255 ranked centralities of each network and the metric intersections in each network for the threshold  
256 0.05. In this threshold, the SHAM network showed the regions IL and BLV as hub, whereas in the  
257 SHAM-nH the BLV and Por were hubs, and the dHPC network the hubs were the Per\_36, Per\_35,  
258 RSC and LAVL. The **Figure 6c** shows which regions were considered stable hubs across the  
259 thresholds, in each network. In the SHAM network, the IL was the only region stably identified as  
260 a hub across all thresholds. In the dHPC network, the RSC, and the Per\_36 were stable across  
261 all thresholds, and in the SHAM-nH network, no hub was stable across the three thresholds, but  
262 the IL was the closest region (hub in the 0.025 and 0.01 thresholds), similar to the SHAM network.  
263 Employing connection-based and distance-based metrics to identify a hub makes more likely that  
264 the identified well-connected regions are also inter-region or inter-modular connectors.  
265 Noticeably, the dCA1 was in the upper quartile of both connection-based metrics, but not the  
266 distance-based ones, across the all thresholds (not shown). These results suggest that different  
267 hubs emerged in the dHPC network. However, as the identification was descriptive, with no  
268 hypothesis test, it does not allow *a priori* interpretations regarding differences in the hub score  
269 between the networks. However, they are a first indication that there might be differences in the  
270 connectivity patterns between the SHAM and dHPC networks, as different regions emerged as  
271 hubs in these networks.

272

273 ***dHPC network hubs are associated to increased centrality measures***

274 We addressed the hub score differences more formally and quantitatively by directly comparing  
275 the centralities between the groups in each region and each threshold using permutation test.  
276 The **Table 2** resumes the results of the permutation tests for each region, metric and threshold.  
277 Most importantly, we observed that the identified stable hubs were overall associated with  
278 significantly higher centrality levels in some metrics, comparing the dHPC SHAM-nH networks. In  
279 the dHPC network, the RSC showed significantly higher Wdg and Evc in all thresholds, and the  
280 Per\_36 showed higher Evc levels in the 0.025 and 0.01 thresholds, compared to SHAM-nH  
281 network. In the SHAM-nH network, the IL showed higher Evc levels in the 0.025 and 0.01  
282 thresholds, compared to the dHPC network. Besides the stable hubs, some of the single-threshold  
283 or two-threshold hubs were also associated to significantly different centrality levels between the  
284 networks. In the dHPC network, the RSGd presented a higher Evc across all thresholds and a  
285 higher Wdg in the 0.025 and 0.01 thresholds. The LAVL had a higher Evc in the 0.025 threshold.  
286 In the SHAM-nH network, the BLV presented a higher Wdg across all thresholds, higher Bet in  
287 the 0.05 and the 0.01 thresholds, and higher Evc in the 0.05 threshold. Further, the CeM and PrL  
288 showed higher Evc, and the RSGv showed higher Bet, all in the 0.01 threshold. Some significant  
289 differences were present in non-hub regions such as BLP, vCA1, DLE and Por (higher metrics in  
290 dHPC network), and LAVM, BLA, and Por (higher metrics in the SHAM-nH network; **Table 2**).  
291 Lastly, some single-threshold hubs did not show significantly different centrality metrics in the  
292 thresholds they were considered hubs, such as LAVL, Per\_35, Por and Cg1 (dHPC network) and  
293 CeL, Por (SHAM-nH network). These results provide evidence that when comparing SHAM-nH  
294 and dHPC networks, stable hubs in one network were associated to higher centrality levels  
295 relative to the other, and vice-versa. These data suggest that the CFC learning network under  
296 dHPC lesion has an increased dependence on its new hubs.

297

298 ***dHPC damage changes interactions among other regions***

299 As the comparison above focused on the nodes, we next examined differences between the  
300 dHPC and SHAM-nH networks based on their edges (correlation coefficients). First, we compared  
301 the distribution of correlations of each matrix between groups using a two-sample KS test. We

302 observed significantly different correlation coefficient distributions between dHPC and SHAM-nH  
303 networks in all thresholds (**threshold 0.05**:  $D_{151} = 0.2527$ ,  $p = 0.0125$ ; **0.025**:  $D_{106} = 0.3396$ ,  $p =$   
304  $0.0042$ ; **0.01**:  $D_{67} = 4795$ ,  $p = 0.0005$ ; **Figure 7a-c**). Next, we compared each correlation  
305 coefficient between the groups. We computed the Z-score of the group difference for each  
306 correlation coefficient and considered a score of  $|2|$  to be significant within the distribution. We  
307 observed 21 correlation differences with Z-scores above  $|2|$  (**Figure 7b**). In nearly 2/3 of the  
308 significant differences (15 out of 21), the stronger correlation coefficients belonged to the SHAM-  
309 nH network, and 9 of them belonged to SHAM-NH hubs in that threshold; whereas only 6  
310 differences the stronger correlation coefficient belonged to the dHPC network, one of which  
311 belonged to a hub (**Figure 7c**). These results were similar across thresholds. In the 0.025  
312 threshold, 19 out of 26 differences were higher in the SHAM-nH network (3 belonging to SHAM-  
313 nH hubs; **Figure 7b**), and in the 0.01 threshold, 20 out of 28 differences were higher in SHAM-  
314 nH network (9 belonging to SHAM-nH hubs; **Figure 7c**). Overall, these results show that the  
315 SHAM-nH network presented a higher number of significantly stronger correlations compared to  
316 the dHPC network, many of which belonged to SHAM-nH hubs for that threshold.  
317 The different correlation distributions and the differences in correlation strengths between the  
318 networks add support to the hypothesis of different connectivity patterns in the dHPC network.  
319 Further, it suggests that dHPC indirectly influences interactions between other regions, most of  
320 which were observed to be weakened.

321

### 322 **Damaging the dHPC network Hubs**

323 The network analysis revealed some differences between the dHPC and the SHAM (or SHAM-  
324 nH) networks. Particularly, the alternative hubs emerging in the dHPC network (Per\_36 and RSC)  
325 and their statistically higher centralities compared to the SHAM-nH network suggest that these  
326 regions may increase in their importance to CFC learning in the absence of hippocampus. We  
327 empirically tested this hypothesis in the next two experiments by damaging both the dHPC and  
328 one of these hubs pre-training to CFC. Our hypothesis is whether further insult to the network  
329 would compromise the necessary structure of the network to promote CFC learning.

330

### 331 **Experiment 2 – Pre-training dHPC-Per double lesion does not impair CFC**

332 In *Experiment 2*, because it was technically difficult to damage specifically the Per\_36 and most  
333 animals had a significant part of the Per\_35 damaged, we considered animals with lesions  
334 extending to both Per\_36 and Per\_35, denominating it Per. Henceforth, Per will be mentioned  
335 when Per\_35 and Per\_36 are considered together. During histological analysis, we excluded four  
336 rats from the dHPC-Per, two from the Per and one from the dHPC groups due to either extensive  
337 bilateral lesions to the regions surrounding Per (Temporal, Auditory, Parietal, Visual cortices,  
338 ventral CA1 or Lateral Amygdala), or no detectable dHPC and/or Per cellular loss in most slices  
339 examined. The final sample in this experiment was 38 (SHAM, dHPC and Per: N = 10/each;  
340 dHPC-Per: N = 8). In the remaining sample, cellular loss was mostly confined to the Per\_36,  
341 Per\_35 and to dHPC. In the dHPC and dHPC-Per groups, slight occasional damage was  
342 observed in the secondary Visual and Medial Parietal cortices overlying dHPC due to needle  
343 insertion (**Figure 8a**). In the behavioral analysis, the bootstrapped ANOVA showed no group  
344 difference ( $F = 0.842$ ,  $p = 0.479$ ; **Figure 8b-c**). The KS test showed no significant differences  
345 among groups' distributions and the Cohen's  $d$  values did not show any considerable effect size  
346 (**Figure 8 bottom**). These results indicate that neither Per or dHPC-Per lesions affect CFC  
347 learning and memory.

348 Previous studies observed no pre-training Per lesion effect on CFC (Phillips and LeDoux, 1995;  
349 Herzog and Otto, 1998), despite some contradictory evidence (Bucci et al., 2000). Our results  
350 support the hypothesis that pre-training Per and dHPC-Per lesions do not affect CFC learning  
351 and memory.

352

### 353 **Experiment 3 – Pre-training dHPC-RSC double lesion impairs CFC**

354 During histological analysis, three rats from the RSC and one from the dHPC-RSC group were  
355 excluded from the analysis due to non-detectable cellular loss in most slices. The final sample in  
356 this experiment was 39 (SHAM: N = 10, dHPC and RSC: N = 9/each, dHPC-RSC: N = 11). The  
357 lesions affected mainly the dHPC and RSC, with frequent lesions to RSGd and occasional minor  
358 unilateral lesions of RSGv and secondary visual cortex. In the behavior analysis, the bootstrapped  
359 ANOVA revealed a main effect of group ( $F_{3,35} = 3.691$ ,  $p = 0.01975$ ), which the  $p$ -corrected  $t$  tests  
360 showed to be due to a lower freezing in the dHPC-RSC compared to that of the SHAM group ( $t_{20}$   
361  $= 3.315$ ,  $p = 0.0270$ ; **Figure 9**). No other significant differences were observed. This result was

362 further confirmed by the KS test, which revealed significantly different distributions between the  
363 dHPC-RSC and the SHAM samples ( $D = 0.609$ ,  $p = 0.0303$ ). No other differences were observed  
364 (SHAM vs dHPC:  $D = 0.378$ ,  $p = 0.330$ ; SHAM vs RSC:  $D = 0.367$ ,  $p = 0.377$ ; dHPC vs RSC:  $D$   
365  $= 0.333$ ,  $p = 0.316$ ; dHPC vs dHPC-Per:  $D = 0.485$ ,  $p = 0.098$ ; Per vs dHPC-Per:  $D = 0.374$ ,  $p =$   
366  $0.289$ ). The Cohen's  $d$  values also confirmed the above results showing a large effect size  
367 between SHAM and dHPC-RSC means ( $d = 1.469$ ). Lesser effect size values were observed in  
368 the other comparisons (SHAM vs dHPC:  $d = 0.463$ ; SHAM vs RSC:  $d = 0.75$ ; dHPC vs Per:  $d =$   
369  $0.338$ ; dHPC vs dHPC-Per:  $d = 1.056$ ; Per vs dHPC-Per:  $d = 0.598$ ), although the effect size  
370 between dHPC and dHPC-RSC was somewhat large.  
371 These results show that both dHPC and RSC contribute to CFC learning, although single lesion  
372 of these regions was not sufficient to impair CFC. Further, it supports the network analysis in  
373 *Experiment 1* that RSC becomes a key region in the dHPC network engaged in CFC learning.

374

## 375 **DISCUSSION**

376

377 The present study employed network science to investigate CFC learning in dHPC-damaged rats.  
378 A fair amount of studies have observed CFC learning in absence of dHPC (Wiltgen et al., 2006;  
379 Fanselow, 2010; Zelikowsky et al., 2012), but no evidence had been provided, so far, regarding  
380 how a compensation mechanism might occur. Our study shows four main findings. First, we found  
381 that the CFC learning network under dHPC damage did not affect the small-worldness observed  
382 in the SHAM and SHAM-nH networks, and presented comparable levels of global and local  
383 efficiencies to the SHAM network. Second, we identified different hubs in each network, which  
384 were associated with different centrality levels between the dHPC and SHAM-nH networks. Third,  
385 differences in correlation coefficients distribution and strength suggest that dHPC indirectly  
386 influence interactions in the network. Fourth, by damaging the regions identified as hubs in the  
387 dHPC network, we showed that double lesion of dHPC and RSC, but not dHPC and Per, disrupt  
388 CFC learning and memory. Overall, despite the unaltered topology, dHPC network was  
389 sufficiently different such that alternative hubs emerged.

390 Many studies have observed small-world architecture in both anatomical and functional brain  
391 networks (Bassett and Bullmore, 2006; 2016). Small-world architecture is proposed to confer

392 optimized cost-efficiency to interactivity (Achard and Bullmore, 2007) and protection to central  
393 regions to targeted attack, when compared to other topologies (i.e. scale free networks; Achard  
394 et al., 2006). Further, topology (integration and segregation) have also been observed to  
395 coordinate network reconfigurations during learning (Bassett et al., 2011), recollection (Fornito et  
396 al., 2012) and to predict errors in learning tasks (Ekman et al., 2012), providing evidence of the  
397 importance of topology to cognitive function. In agreement with this framework, the present data  
398 show unaltered CFC memory behavior and network integration and segregation levels,  
399 maintaining small-worldness in CFC learning network even under dHPC insult.

400 In the present study, the RSC and Per\_36 showed stable hubness in the dHPC network and  
401 presented higher centrality levels compared to SHAM-nH network. These regions are deemed as  
402 central components of the proposed antero-temporal (AT, Per\_36) and postero-medial (PM, RSC)  
403 memory systems that converge to the hippocampus (Ritchey et al., 2015), suggesting that dHPC  
404 damage increases the importance of the 'upstream' regions. Albeit the validation experiments  
405 showed impaired CFC memory only in the dHPC-RSC double lesions, but not dHPC-Per, the  
406 centrality comparison supports this double lesion data. The RSC displayed more robust centrality  
407 differences, with significance in more metrics and in all thresholds. These stable centrality  
408 differences may be reflecting an increased demand over – and dependence on – the RSC in the  
409 dHPC network.

410 Our data also corroborates the current framework of Per and retrosplenial cortex (RSG) functions.  
411 The Per is related to recognition, affective processing and associative memory of non-spatially  
412 referenced cues (Kealy and Commins, 2011; Suzuki and Naya, 2014; Kinnavane et al., 2017),  
413 whereas the RSG is important for processing spatial, contextual information and episodic memory  
414 (Ritchey et al., 2015; Todd and Bucci, 2015). Therefore, it is parsimonious that the CFC network  
415 under dHPC damage be more dependent on RSG than on Per.

416 The RSG has been considered an anatomical connector of the diencephalon, medial temporal  
417 lobe and cortices implicated in anterograde amnesia (Aggleton, 2008; Vann et al., 2009). A recent  
418 re-emerged interest in the RSG provided a diverse number of evidences highlighting its function.  
419 For instance, studies in humans showed increased activity in RSG for stable landmarks when  
420 navigating in virtual reality environments (Auger et al., 2012; Auger et al., 2015, 2017). Studies in  
421 animal models provided evidence that RSG integrates, encodes and stores spatial information

422 (Czajkowski et al., 2014; Alexander and Nitz, 2015; Jacob et al., 2017), that it is necessary during  
423 spatial navigation (Pothuizen et al., 2008; Nelson et al., 2015a) and context fear learning and  
424 memory (Keene and Bucci, 2008b; Cowansage et al., 2014; Todd et al., 2017). This framework  
425 suggests that the RSG is an important component of spatial learning and memory systems.  
426 Furthermore, RSG is highly interactive with regions known to be involved in spatial and contextual  
427 learning such as hippocampus (Cooper and Mizumori, 2001) and Per (Robinson et al., 2012).  
428 The present results are in line with these findings and suggest that in dHPC absence, contextual  
429 learning networks might increase their dependence over the RSG.

430 On a different perspective, increased functional connectivity and centrality levels are hallmarks in  
431 patients with traumatic brain injury (TBI; Hillary et al., 2015). Some authors propose that  
432 hyperconnectivity is a natural response to brain insult and reflects an overload of alternative  
433 reminiscent pathways still capable of supplying the cognitive demand (Caeyenberghs et al., 2016;  
434 Hillary and Grafman, 2017). Regions exhibiting increased connectivity generally compose  
435 network rich clubs, including the RSG and Per (regions defined as PCC, and ParaHipp,  
436 respectively; Hillary et al., 2014; Hillary et al., 2015). The present findings extend the occurrence  
437 of the increased centrality levels of RSG and Per after CFC learning under dHPC damage and  
438 provide evidence for the validity of the network measures, under some stability of the effect.

439 The hyperconnectivity accounts also challenges the notion that post-lesion connectivity increases  
440 are an adaptive compensatory mechanism. For instance, increased connectivity was observed to  
441 not be predictive of cognitive performance and even to diminish in the pre-frontal cortex after  
442 sustained practice of a working memory task (Medaglia et al., 2012). Whilst much is unknown  
443 about post-injury increased functional connectivity, future work could test if remote CFC memory  
444 or multiple CFC sessions result in a dHPC network closer to that of controls.

445 We also observed an indirect influence of dHPC lesion on interactions among other regions, which  
446 is consistent with both simulation of functional brain activity under brain damage (Alstott et al.,  
447 2009), and studies on unilateral focal brain lesions (Corbetta et al., 2005; He et al., 2007). This  
448 non-local alteration in connectivity was associated with behavioral impairments in patients.  
449 Although we did not observe a contextual fear memory impairment, the altered pattern of  
450 connectivity observed gives support to a partially different CFC learning network under dHPC

451 damage, and suggests that what is learned (associated to the shock) might be different under  
452 lesion.

453 Importantly, the lack of effect on pre-training lesions involving Per should not be taken as evidence  
454 against its involvement in CFC. As RSC and Per in this study, pre-training hippocampal lesions  
455 do not impair CFC either (Wiltgen et al., 2006). Further, post-training lesions to all these regions  
456 resulted in impaired CFC memory (Bucci et al., 2000; Burwell et al., 2004; Wiltgen et al., 2006;  
457 Todd et al., 2017) and after pharmacological manipulations (Schenberg and Oliveira, 2008;  
458 Albrechet-Souza et al., 2011; Corcoran et al., 2011), evidencing that these regions do play a role  
459 in CFC. Our hypothesis was focused on whether compensation would still occur further targeted  
460 network damage to the dHPC network.

461 Moreover, previous studies employing pre-training single lesions on both Per and RSG have  
462 reported conflicting results regarding their effect on CFC. On Per lesions, one study reported  
463 impaired CFC memory in Per-damaged animals (Bucci et al., 2000), whereas other reports did  
464 not find impairment (Phillips and LeDoux, 1995; Herzog and Otto, 1998). These studies employed  
465 different lesion methods and behavioral parameters, rendering it difficult to point a source of the  
466 discrepancy. Although the present study employed methods closer to that of Bucci and colleagues  
467 (2000), the conflicting results remain. Regarding RSG, Keene and Bucci (2008b, a) have  
468 consistently observed impaired CFC memory in pre-training RSG lesions, whereas another study  
469 did not find such impairment (Lukoyanov and Lukoyanova, 2006). Our procedures were as similar  
470 as possible to that of Keene and Bucci (2008b), however, we aimed for the RSC instead of the  
471 whole RSG. Although we did damage portions of RSGd in some animals it is possible that our  
472 lack of effect on RSC single lesions was due to not damaging the whole RSG. Alternatively, it is  
473 possible that Per and RSG single lesions may be at least partially compensated just as dHPC  
474 lesions, resulting in higher rates of mixed results due to a less effective learning (Fanselow, 2010).  
475 Despite the unimpaired behavior in dHPC-damaged animals, it is very likely that the contextual  
476 information learned is different (Frankland et al., 1998; Nadel, 2008). Some authors discussed  
477 about the complexity of the CS under hippocampal damage (Rudy, 2009; Fanselow, 2010),  
478 however, clearly assessing the content learned as CS in CFC preparations remains as a  
479 limitation. Findings from tasks that allow a better assessment of the learned content strongly  
480 suggest that both Per and RSG support configural learning – defined as complex stimuli bound



481 together in a stimulus-stimulus manner. For instance, Per-damaged rodents have impaired  
482 complex visual discrimination tasks (Eacott et al., 2001; Hales et al., 2015), and RSG-damaged  
483 rodents have impaired spatial memory in tasks in which spatial cues moved between trials  
484 (Hindley et al., 2014; Nelson et al., 2015b). Further, RSG was shown to integrate distributed  
485 spatial information across delimiting marks (Alexander and Nitz, 2015). These data suggest that  
486 RSC and Per can support some configural learning in dHPC-damaged animals. This is supported  
487 by studies employing whole-hippocampus damage and complex maze tasks (Winocur et al.,  
488 2010).

489

#### 490 **Methodological considerations and Limitations**

491 There are some points about the present study that need attention when interpreting the results.  
492 First, the lesion method used in *Experiment 1* (electrolytic lesion) does not spare fibers of  
493 passage, which may have affected connections between other regions. Whilst this could have  
494 altered the network more than intended, the behavior data suggests that the network is likely to  
495 contain the elements required in CFC learning and memory since no impairment was observed.  
496 Furthermore, the networks studied here, which are based on pCREB expression, identified similar  
497 hubs to recent anatomical studies based on larger tract-tracing databases (Binicewicz et al., 2015;  
498 Bota et al., 2015), making a confounding effect of fiber lesion unlikely.

499 Second, the *Experiment 1* differs from *Experiments 2* and *3* in number of shocks during the  
500 training session. Single shock CFC sessions is generally a weaker experience and tend to yield  
501 more variable levels of behavior. We used the three shocks procedure to ensure a robust  
502 performance level in *Experiments 2-3* such that impairments would be more detectable.  
503 Additionally, the performances of SHAM controls and dHPC groups were very similar, ruling out  
504 the possibility of a 'hidden' memory impairment in the dHPC group in *Experiment 1*.

505

#### 506 **Conclusion**

507 There is growing interest in the use of network approaches to predict cognitive performance from  
508 brain imaging data (Bassett et al., 2011; Ekman et al., 2012; Fornito et al., 2012). However,  
509 formally testing predictions in human experimentation is still a challenge called for attention  
510 (Petersen and Sporns, 2015). We applied network analysis in rodent models such that we could

511 empirically test the validity of these models later. We found that new hubs identified in the CFC  
512 network under dHPC damage may compromise the formation of the functional network necessary  
513 for CFC learning and memory. Future employment of finer techniques (i.e. optogenetics,  
514 transgenic animals) may provide sophisticated ways to test network predictions.

515

## 516 **MATERIALS AND METHODS**

517

### 518 ***Subjects***

519 A hundred and thirty nine male Wistar rats weighting 300-370g were obtained from the university  
520 vivarium (CEDEME, SP). They were housed in groups of 4 - 5 and maintained on a 12h light/dark  
521 cycle, room temperature of  $22 \pm 2^{\circ}\text{C}$ , with free access to food and water. All experiments were  
522 approved by the University Committee of Ethics in Animal Research (#0392/10, #409649 and  
523 #7683270116) and were in accordance with National Institutes of Health Guide for the Care and  
524 Use of Laboratory Animals.

525

### 526 ***Surgery***

527 The rats were anesthetized with Ketamine (90mg/kg, Ceva, Paulínia, Brazil) and Xilazine  
528 (50mg/kg, Ceva, Paulínia, Brazil), and mounted into a stereotaxic frame (David Kopf Instruments,  
529 Tujunga, CA). Each animal had their scalp incised, retracted and the bregma and lambda  
530 horizontally adjusted to the same plane. Small holes were drilled in the skull in the appropriate  
531 sites. The rats received bilateral electrolytic lesions in the dHPC by an anodic current (2 mA, 20  
532 s) passed through a stainless steel electrode insulated except for about 0.7 mm at the tip. The  
533 following coordinates were used: - 4.0 mm from bregma (AP),  $\pm 2.0$  and  $\pm 4.0$  mm from the midline  
534 (ML) and -3.6 mm from the skull surface (DV). Control (SHAM) animals underwent the same  
535 procedure except that they did not receive currents. After the surgery, the rats received antibiotic  
536 and diclofenac intramuscularly (3mg/kg, Zoetis, Madison, NJ) and were allowed to recover for 15  
537 days. To avoid corneal lesions associated to the anesthetic used, the rats had their eyes hydrated  
538 with ophthalmic gel (Bausch & Lomb, Rochester, NY) and received a post-surgery injection of  
539 yohimbine (2mg/kg, Sigma, St. Louis, MO).

540 In *Experiment 2* the surgeries were performed as above, but the rats received bilateral neurotoxic  
541 lesions in the dHPC, Perirhinal cortex (Per), both (dHPC-Per) or SHAMs. The lesions were made  
542 by N-methyl-D-aspartic acid (NMDA, 20 mg/ml in 0.1 M phosphate buffered saline, pH 7.4; Sigma,  
543 St. Louis, MO) injected by a 10  $\mu$ l Hamilton syringe held by a microinjector (Insight, Ribeirão Preto,  
544 Brazil) and connected to 27 gauge injecting needles by polyethylene tubes. In the dHPC, 0.45  $\mu$ l  
545 of NMDA was injected at a rate of 15  $\mu$ l/min in each of the following coordinates: (1) AP: - 2.8  
546 mm, ML:  $\pm$  1.5 mm and DV: - 3.6 mm; (2) AP: - 4.2 mm, ML:  $\pm$  1.5 and  $\pm$  4.0 mm and DV: - 4.0  
547 mm. In the Per, 0.1  $\mu$ l of NMDA was injected (0.1  $\mu$ l/min) in each of the following coordinates: AP:  
548 - 2.6, - 3.5, - 4.4, - 5.4 and - 6.5 mm, ML:  $\pm$  5.9,  $\pm$  6.1,  $\pm$  6.1,  $\pm$  6.5 and  $\pm$  6.4 mm, DV: - 7.4, - 7.4,  
549 - 7.4, - 7.2 and - 7.0. The needle remained in place for an additional 3 min. The post-surgical  
550 procedures were identical to those in Experiment 1.

551 In *Experiment 3*, surgeries were performed as in *Experiment 2*, but for lesions of the dHPC,  
552 disgranular retrosplenial (RSC), both (dHPC-RSC) or SHAMs. In the RSC, 0.2  $\mu$ l of 20 mg/ml  
553 NMDA was injected (0.1  $\mu$ l/min) in the following coordinates: AP: - 3.0, -4.0, - 5.0, - 6.0 and - 7.3  
554 mm, ML:  $\pm$  0.4,  $\pm$  0.4,  $\pm$  0.5,  $\pm$  0.7 and  $\pm$  0.8 mm, DV: - 0.8, - 1.0, - 1.0, - 1.1 and - 1.5 mm.

555

## 556 ***Apparatus***

557 We used a fear conditioning chamber (32 x 25 x 25 cm, Med Associates, St. Albans, VT) equipped  
558 with Video Freeze System. The chamber was composed of aluminum (sidewalls), polycarbonate  
559 (front wall and ceiling), white opaque acrylic (back) pieces and a grid floor of stainless steel rods  
560 (4.8 mm thick) spaced 1.6 cm apart. A sound-attenuating chamber with fans (60 dB) provided  
561 background noise and white house lights enclosed the chamber. After each animal, the chamber  
562 was cleaned with 10% ethanol.

563

## 564 ***Contextual Fear Conditioning (CFC)***

565 Before every experiment, all animals were gently handled for 3 consecutive days.

566 In *Experiment 1*, during the training session, the rats were individually placed into the conditioning  
567 chamber for 2 min, received a 1 s, 0.8 mA footshock, and were returned to their homecage after  
568 1 min. One additional control group of SHAM animals (Imm) was placed in the conditioning  
569 chamber, received an immediate footshock and was immediately returned to the homecage. Half

570 of the cohort was re-exposed to the context 48h later for 5 min to test contextual fear memory.  
571 Behavior was recorded in both sessions by a micro-camera in the chamber. An experimenter  
572 blind to the grouping measured the freezing behavior, defined as complete immobility except for  
573 breathing movements (Bouton and Bolles, 1980), which served as our measure of contextual fear  
574 memory.

575 In *Experiments 2 and 3*, rats were placed into the conditioning chamber for 2 min, but received  
576 three 1 s, 0.8 mA footshocks, with 30 s inter-trial interval, and were returned to their homecage  
577 after 1 min. The rest of the procedure is identical to *Experiment 1*, except that there was no Imm  
578 control group.

579

### 580 ***Perfusion and Immunohistochemistry***

581 Phosphorylated CREB (pCREB) has a two-phase peak expression profile, which the latter (3-6  
582 h) was shown to present a clearer associative learning-specific expression (Stanciu et al., 2001;  
583 Trifilieff et al., 2006). Therefore, we used a 3h time window of pCREB expression in our study.  
584 Three hours following training in *Experiment 1*, half the cohort was deeply anesthetized and  
585 perfused transcardially with buffered saline and 4% paraphormaldehyde (PFA) in 0.1 M sodium  
586 buffer (pH 7.4). The brains were extracted, post-fixed in PFA, cryoprotected in 20% buffered  
587 sucrose, frozen and stored at -80°C. The brains were coronally sectioned in 30 µm thick slices in  
588 a cryostat (@Leica, Wetzlar, Germany) and stored in 4 serial sets. One set was collected in glass  
589 slides and stained with cresyl violet for morphological and lesion analysis, another set was used  
590 for phospho-CREB immunolabelling and the two remaining were stored for future studies.

591 Immunolabelling was performed in free-floating sections using anti-phospho-CREB (1:1000,  
592 Santa Cruz, Dallas, TX) as primary rabbit polyclonal antibody. A Biotinylated goat anti-rabbit  
593 antibody (1:800, Vector Labs, Burlingame, CA) was used as secondary antibody. The reaction  
594 was revealed using the avidin-biotin peroxidase method conjugated to diaminobenzidine as the  
595 chromogen (ABC and DAB kits, Vector Labs, Burlingame, CA) as described previously (de  
596 Oliveira Coelho et al., 2013).

597

### 598 ***pCREB quantification***

599 The pCREB expression was measured in 30 brain regions including hippocampal,  
600 parahippocampal, amygdalar and prefrontal regions (see **Table 1**) previously shown to have  
601 involvement in FC and/or context learning. The dHPC group had 27 regions measured, since  
602 dCA1, dCA3 and dDG were damaged. The regions were delimited manually using ImageJ free  
603 software. The anatomical delimitation was based on the Rat Brain Atlas Paxinos and Watson  
604 (2007) as on other anatomical studies (see **Table 1**; Insausti et al., 1997; Burwell, 2001; Sugar et  
605 al., 2011). Images (32-bit RGB) were taken at 4X and 10X magnifications using a light microscope  
606 (Olympus, Waltham, MA), and pCREB-positive cells quantified using the automated, high-  
607 throughput, open-source CellProfiler software (Carpenter et al., 2006). A pipeline was created to  
608 calculate the area of each region in mm<sup>2</sup> and to identify stained nuclei based on their intensity,  
609 shape and size (20-150 μm<sup>2</sup>; **Figure 2**). The quantification was performed bilaterally in 6  
610 sections/region (3 in each hemisphere). The data was expressed in nuclei density (nuclei/mm<sup>2</sup>).  
611 In each region and animal, three sections quantified bilaterally were averaged and computed as  
612 the expression data.

613 The pCREB is known to possess both a higher baseline and a higher expression profile (around  
614 twofold) compared to c-fos, an immediate early more commonly used as a proxy for neuronal  
615 activity (Hall et al., 2001; Stanciu et al., 2001; Colombo et al., 2003). Although a baseline signal  
616 close to zero is preferable in most studies, for correlation-based connectivity inference it blunts  
617 sensitivity to observe negative correlations, as a diminished expression is less observable.  
618 Detecting possible negative correlations was desired in our study, making pCREB a suitable proxy  
619 for neuronal activity. Further, pCREB has a well distinguishable expression in associative learning  
620 studies (Stanciu et al., 2001; Colombo et al., 2003; Trifilieff et al., 2006).

621

## 622 ***Histology***

623 In all experiments, the histological examination of the lesions was performed in the cresyl violet  
624 stained slices (150 μm apart) using a light microscope (Olympus, Waltham, MA). Lesions were  
625 identified visually as presence of tissue necrosis, absence of tissue or marked tissue thinning.  
626 Animals with no bilateral lesions of the target region or with lesions present in less than half the  
627 slices analyzed were excluded. An expressive bilateral lesion (50%) of untargeted regions was  
628 also an exclusionary criterion.

629

### 630 **Functional Connectivity and Network Generation**

631 Different from the typical neuroimaging studies in humans, which acquire multiple measurements  
632 across time (i.e. EEG, fMRI), task-dependent large-scale brain activity in experimental animals is  
633 more limited. As immunohistochemistry provides a single *post-mortem* measure per region per  
634 animal, inter-regional co-activation is assessed across subjects. We used the pCREB-positive  
635 nuclei density to compute the Pearson correlation coefficient between all possible pairs of regions  
636 in each group (total of 435 coefficients in SHAM and 351 in the dHPC group). As SHAM matrix  
637 has 3 regions (dCA1, dCA3 and dDG) more than dHPC matrix, a “SHAM with no dorsal  
638 hippocampal regions” (SHAM-nH) was also calculated. The network derived from this matrix  
639 served to directly compare the network of these groups. Three thresholds were applied to the  
640 correlation matrices, maintaining only coefficients with two-tailed significance level of  $p \leq 0.05$ ,  
641 0.025 or 0.01. This resulted in weighted undirected network graphs composed by the brain  
642 regions (nodes) and the remaining inter-regional correlations (edges), representing connections  
643 between the regions (**Figure 3**). The network analyses were performed in the networks of all  
644 thresholds.

645

### 646 **Network Measures**

647 Topological metrics: This analysis was performed in distance ( $1 - \text{Pearson's } r$ ) matrices derived  
648 from the thresholded correlation matrices. We assessed the networks topology using global  
649 efficiency (Geff) as our measure of integration and mean local efficiency (Leff) as our measure of  
650 Segregation (Latora and Marchiori, 2001). Geff is defined as the mean of the inverse of all shortest  
651 paths in the network. And Leff is defined as the Geff applied to a subgraph composed by all  
652 neighbors of a given node.

653 Brain networks have been consistently characterized as possessing a *small-world* topology  
654 (Sporns and Zwi, 2004; Achard et al., 2006; Bassett and Bullmore, 2016). Small-worldness is  
655 usually estimated by metrics of integration and segregation, evincing equivalent integration and  
656 higher segregation relative to random networks (Watts and Strogatz, 1998). We compared the  
657 Geff and mean Leff of our empirical networks to those of randomized networks to test whether  
658 the empirical networks were small-world and if dHPC lesion affects the network small-worldness.

659 Centrality Metrics and Hub Identification: Hubs were identified using four centrality metrics:  
660 weighted degree (Wdg), eigenvector (Evc), Closeness (Clo) and Betweenness (Bet). For each  
661 metric, we intersected the 25% most central regions (upper quartile) of all four metrics and  
662 considered any regions within the intersection of at least three metrics as a hub for that threshold.  
663 To ensure a hub identification that was irrespective of thresholding, we intersected the hubs in  
664 each threshold and considered a stable hub any region present in all thresholds. As Wdg and Evc  
665 are connection-based metrics (based on number of connections), and Clo and Bet are distance-  
666 based metrics (based on short paths), we ensured that these regions were highly ranked in at  
667 least one metric of each type.

668

### 669 **Statistical Analysis**

670 In the cohort tested for fear memory, we compared the Total Freezing Time during memory test  
671 between the groups by three statistical tests: one-way ANOVA, Kolmogorov-Smirnov (KS) tests  
672 and Cohen's d effect size. In the ANOVAs and KS tests, we used a bootstrap resampling. The  
673 bootstrap resampling was defined by 1) randomly resampling the sample, with replacement of  
674 subjects by others (from the sample), 2) calculating the statistics of interest (i.e.  $F_{\text{resampled}}$ ) and 3)  
675 repeating it many times (10000). It generates an empirical sample-based artificial distribution of  
676 the statistics of interest under the null hypothesis, and allows to test if the empirical data statistics  
677 ( $F_{\text{empirical}}$ ) differs from random null hypothesis distribution. The p-value was calculated as the  
678 frequency of  $F_{\text{empirical}}$  occurring in the resampled distribution [ $p = (F_{\text{resampled}} > F_{\text{empirical}})/10000$ ].  
679 There is no normality (or any other) assumption to bootstrap resampling tests, allowing  
680 comparisons when the population distribution is not normal or unknown. Multiple comparisons  
681 were assessed by t tests with bootstrap resampling, as above, correcting the p-value by the  
682 number of concomitant comparisons.

683 In the cohort that had their brains immunolabelled for pCREB, the pCREB expression was  
684 quantified in 30 regions (27 in the dHPC group) as positive nuclei/mm<sup>2</sup>, and each region was  
685 compared between the groups using t tests with bootstrap resampling (as above), correcting the  
686 p-value with a false discovery rate (fdr) test (Benjamini and Hochberg, 1995).

687 In the hypothesis test for small-world network, each empirical network was 'rewired' as described  
688 previously (Maslov and Sneppen, 2002) to generate 10000 random, null hypothesis networks with

689 the same number of nodes, edges, weights and degree distribution. Each network was rewired a  
690 number of times equal to half the number of their edges to generate the randomized networks.  
691 We calculated the Geff and mean Leff empirical/random ratio for each randomized network. It  
692 was expected for the Geff ratios to be around 1 and the mean Leff ratios to be above 1.  
693 After the hub identification, we directly compared the centrality level of each region (in each  
694 threshold) between the dHPC and SHAM-nH networks using a permutation test. In the  
695 permutation procedure, we 1) randomized the grouping labels without replacement, 2) calculated  
696 the centrality values differences [Diff = C<sub>SHAM</sub> - C<sub>dHPC</sub>] in each region and 3) repeated it 10000  
697 times. The p-value was calculated as the frequency of the empirical difference (Diff<sub>empirical</sub>)  
698 occurring in the resampled (Diff<sub>resampled</sub>) distribution [p = (Diff<sub>resampled</sub> > Diff<sub>empirical</sub>)/10000]. No  
699 comparisons with the SHAM network were performed as both networks have to be the same size.  
700 To test whether dHPC lesion influences interactions between other regions in the network, we  
701 compared the correlation coefficients between SHAM-nH and dHPC networks. We normalized  
702 the thresholded matrices using a Fisher's Z transformation and compared the normalized  
703 correlation coefficient distributions in the dHPC and SHAM-nH networks with a two-sample KS  
704 test. Next, we calculated the z-score of the correlation coefficient difference between each cell of  
705 the matrices as in the formula bellow, defining an index of connectivity change, as done previously  
706 (Alstott et al., 2009). The Z-score values above |2| were considered significant (corresponding to  
707 a level of significance of  $\alpha = 0.05$ ). We verified which group possessed each significantly higher  
708 coefficient, and which nodes they connect.

709

$$dC = \frac{R_{sham} - R_{dhpc}}{\sqrt{\frac{1}{(df_{sham}-3)} + \frac{1}{(df_{dhpc}-3)}}}$$

710 where df is the degree of freedom in each group.

711 In all analyses, a corrected-p < 0.05 was considered significant. All statistical and graph theory  
712 analyses and figures were performed in R studio (R, 2013) using custom-written routines  
713 (available at [https://github.com/coelho/Brain\\_Network\\_analysis](https://github.com/coelho/Brain_Network_analysis)) and the packages igraph  
714 (Csardi and Nepusz, 2006), Matrix (Bates and Maechler, 2015), lattice (Sakar, 2008), ggplot2  
715 (Wickham, 2009), corrplot (Wei, 2013), car (Fox and Weisberg, 2011) and VennDiagram (Chen,  
716 2015).

717



718 **REFERENCES**

719

- 720 Achard S, Bullmore E (2007) Efficiency and cost of economical brain functional networks. *PLoS*  
721 *Comput Biol* 3:e17.
- 722 Achard S, Salvador R, Whitcher B, Suckling J, Bullmore E (2006) A resilient, low-frequency, small-  
723 world human brain functional network with highly connected association cortical hubs.  
724 *J Neurosci* 26:63-72.
- 725 Aggleton JP (2008) EPS Mid-Career Award 2006. Understanding anterograde amnesia:  
726 disconnections and hidden lesions. *Q J Exp Psychol (Hove)* 61:1441-1471.
- 727 Alberini CM (2009) Transcription factors in long-term memory and synaptic plasticity. *Physiol*  
728 *Rev* 89:121-145.
- 729 Albrechet-Souza L, Borelli KG, Almada RC, Brandão ML (2011) Midazolam reduces the selective  
730 activation of the rhinal cortex by contextual fear stimuli. *Behav Brain Res* 216:631-638.
- 731 Alexander AS, Nitz DA (2015) Retrosplenial cortex maps the conjunction of internal and external  
732 spaces. *Nat Neurosci* 18:1143-1151.
- 733 Alstott J, Breakspear M, Hagmann P, Cammoun L, Sporns O (2009) Modeling the impact of  
734 lesions in the human brain. *PLoS Comput Biol* 5:e1000408.
- 735 Auger SD, Mullally SL, Maguire EA (2012) Retrosplenial cortex codes for permanent landmarks.  
736 *PLoS One* 7:e43620.
- 737 Auger SD, Zeidman P, Maguire EA (2015) A central role for the retrosplenial cortex in de novo  
738 environmental learning. *Elife* 4.
- 739 Auger SD, Zeidman P, Maguire EA (2017) Efficacy of navigation may be influenced by  
740 retrosplenial cortex-mediated learning of landmark stability. *Neuropsychologia*  
741 104:102-112.
- 742 Bassett DS, Bullmore E (2006) Small-world brain networks. *Neuroscientist* 12:512-523.
- 743 Bassett DS, Bullmore ET (2016) Small-World Brain Networks Revisited. *Neuroscientist*.
- 744 Bassett DS, Wymbs NF, Porter MA, Mucha PJ, Carlson JM, Grafton ST (2011) Dynamic  
745 reconfiguration of human brain networks during learning. *Proc Natl Acad Sci U S A*  
746 108:7641-7646.
- 747 Bates D, Maechler M (2015) Matrix: Sparse and Dense Matrix Classes and Methods. In, R  
748 package version 1.2-3 Edition, pp <http://CRAN.R-project.org/package=Matrix>
- 749 Benjamini Y, Hochberg Y (1995) Controlling the False Discovery Rate: A Practical and Powerful  
750 Approach to Multiple Testing. *Journal of the Royal Statistical Society Series B*  
751 (Methodological) 57:289-300.
- 752 Binicewicz FZ, van Strien NM, Wadman WJ, van den Heuvel MP, Cappaert NL (2015) Graph  
753 analysis of the anatomical network organization of the hippocampal formation and  
754 parahippocampal region in the rat. *Brain Struct Funct*.
- 755 Bota M, Sporns O, Swanson LW (2015) Architecture of the cerebral cortical association  
756 connectome underlying cognition. *Proc Natl Acad Sci U S A* 112:E2093-2101.
- 757 Bouton ME, Bolles RC (1980) Conditioned fear assessed by freezing and by the suppression of  
758 three different baselines. *Anita Learn Behav* 8:6.
- 759 Bucci DJ, Robinson S (2014) Toward a conceptualization of retrohippocampal contributions to  
760 learning and memory. *Neurobiol Learn Mem* 116:197-207.
- 761 Bucci DJ, Phillips RG, Burwell RD (2000) Contributions of postrhinal and perirhinal cortex to  
762 contextual information processing. *Behav Neurosci* 114:882-894.
- 763 Bullmore E, Sporns O (2009) Complex brain networks: graph theoretical analysis of structural  
764 and functional systems. *Nat Rev Neurosci* 10:186-198.
- 765 Burwell RD (2001) Borders and cytoarchitecture of the perirhinal and postrhinal cortices in the  
766 rat. *J Comp Neurol* 437:17-41.

- 767 Burwell RD, Bucci DJ, Sanborn MR, Jutras MJ (2004) Perirhinal and postrhinal contributions to  
768 remote memory for context. *J Neurosci* 24:11023-11028.
- 769 Caeyenberghs K, Verhelst H, Clemente A, Wilson PH (2016) Mapping the functional connectome  
770 in traumatic brain injury: What can graph metrics tell us? *Neuroimage*.
- 771 Carpenter AE, Jones TR, Lamprecht MR, Clarke C, Kang IH, Friman O, Guertin DA, Chang JH,  
772 Lindquist RA, Moffat J, Golland P, Sabatini DM (2006) CellProfiler: image analysis  
773 software for identifying and quantifying cell phenotypes. *Genome Biol* 7:R100.
- 774 Chen H (2015) VennDiagram: Generate High-Resolution Venn and Euler Plots. In.
- 775 Colombo PJ, Brightwell JJ, Countryman RA (2003) Cognitive strategy-specific increases in  
776 phosphorylated cAMP response element-binding protein and c-Fos in the hippocampus  
777 and dorsal striatum. *J Neurosci* 23:3547-3554.
- 778 Cooper BG, Mizumori SJ (2001) Temporary inactivation of the retrosplenial cortex causes a  
779 transient reorganization of spatial coding in the hippocampus. *J Neurosci* 21:3986-4001.
- 780 Corbetta M, Kincade MJ, Lewis C, Snyder AZ, Sapir A (2005) Neural basis and recovery of  
781 spatial attention deficits in spatial neglect. *Nature Neuroscience* 8:1603 - 1610
- 782 Corcoran KA, Donnan MD, Tronson NC, Guzmán YF, Gao C, Jovasevic V, Guedea AL, Radulovic J  
783 (2011) NMDA receptors in retrosplenial cortex are necessary for retrieval of recent and  
784 remote context fear memory. *J Neurosci* 31:11655-11659.
- 785 Cowansage KK, Shuman T, Dillingham BC, Chang A, Golshani P, Mayford M (2014) Direct  
786 reactivation of a coherent neocortical memory of context. *Neuron* 84:432-441.
- 787 Crossley NA, Fox PT, Bullmore ET (2016) Meta-connectomics: human brain network and  
788 connectivity meta-analyses. *Psychol Med* 46:897-907.
- 789 Csardi G, Nepusz T (2006) The igraph software package for complex network research. In, p  
790 1695: *InterJournal*.
- 791 Czajkowski R, Jayaprakash B, Wiltgen B, Rogerson T, Guzman-Karlsson MC, Barth AL,  
792 Trachtenberg JT, Silva AJ (2014) Encoding and storage of spatial information in the  
793 retrosplenial cortex. *Proc Natl Acad Sci U S A* 111:8661-8666.
- 794 de Oliveira Coelho CA, Ferreira TL, Soares JC, Oliveira MG (2013) Hippocampal NMDA receptor  
795 blockade impairs CREB phosphorylation in amygdala after contextual fear conditioning.  
796 *Hippocampus*.
- 797 Eacott MJ, Machin PE, Gaffan EA (2001) Elemental and configural visual discrimination learning  
798 following lesions to perirhinal cortex in the rat. *Behav Brain Res* 124:55-70.
- 799 Ekman M, Derrfuss J, Tittgemeyer M, Fiebach CJ (2012) Predicting errors from reconfiguration  
800 patterns in human brain networks. *Proc Natl Acad Sci U S A* 109:16714-16719.
- 801 Fanselow MS (2010) From contextual fear to a dynamic view of memory systems. *Trends Cogn*  
802 *Sci* 14:7-15.
- 803 Fanselow MS, Poulos AM (2005) The neuroscience of mammalian associative learning. *Annu Rev*  
804 *Psychol* 56:207-234.
- 805 Fornito A, Harrison BJ, Zalesky A, Simons JS (2012) Competitive and cooperative dynamics of  
806 large-scale brain functional networks supporting recollection. *Proc Natl Acad Sci U S A*  
807 109:12788-12793.
- 808 Fox J, Weisberg S (2011) *An R Companion to Applied Regression*, second Edition. Thousand Oaks,  
809 CA: Sage.
- 810 Frankland PW, Cestari V, Filipkowski RK, McDonald RJ, Silva AJ (1998) The dorsal hippocampus  
811 is essential for context discrimination but not for contextual conditioning. *Behav*  
812 *Neurosci* 112:863-874.
- 813 Gale GD, Anagnostaras SG, Fanselow MS (2001) Cholinergic modulation of pavlovian fear  
814 conditioning: effects of intrahippocampal scopolamine infusion. *Hippocampus* 11:371-  
815 376.
- 816 Geschwind N (1965) Disconnexion syndromes in animals and man. I. *Brain* 88:237-294.
- 817 Hales JB, Broadbent NJ, Velu PD, Squire LR, Clark RE (2015) Hippocampus, perirhinal cortex, and  
818 complex visual discriminations in rats and humans. *Learn Mem* 22:83-91.

- 819 Hall J, Thomas KL, Everitt BJ (2001) Fear memory retrieval induces CREB phosphorylation and  
820 Fos expression within the amygdala. *Eur J Neurosci* 13:1453-1458.
- 821 He BJ, Snyder AZ, Vincent JL, Epstein A, Shulman GL, Corbetta M (2007) Breakdown of  
822 Functional Connectivity in Frontoparietal Networks Underlies Behavioral Deficits in  
823 Spatial Neglect. *Neuron* 53:905–918
- 824 Herzog C, Otto T (1998) Contributions of anterior perirhinal cortex to olfactory and contextual  
825 fear conditioning. *Neuroreport* 9:1855-1859.
- 826 Hillary FG, Grafman JH (2017) Injured Brains and Adaptive Networks: The Benefits and Costs of  
827 Hyperconnectivity. *Trends Cogn Sci*.
- 828 Hillary FG, Roman CA, Venkatesan U, Rajtmajer SM, Bajo R, Castellanos ND (2015)  
829 Hyperconnectivity is a fundamental response to neurological disruption.  
830 *Neuropsychology* 29:59-75.
- 831 Hillary FG, Rajtmajer SM, Roman CA, Medaglia JD, Slocomb-Dluzen JE, Calhoun VD, Good DC,  
832 Wylie GR (2014) The rich get richer: brain injury elicits hyperconnectivity in core  
833 subnetworks. *PLoS One* 9:e104021.
- 834 Hindley EL, Nelson AJ, Aggleton JP, Vann SD (2014) The rat retrosplenial cortex is required when  
835 visual cues are used flexibly to determine location. *Behav Brain Res* 263:98-107.
- 836 Insausti R, Herrero MT, Witter MP (1997) Entorhinal cortex of the rat: cytoarchitectonic  
837 subdivisions and the origin and distribution of cortical efferents. *Hippocampus* 7:146-  
838 183.
- 839 Jacob PY, Casali G, Spieser L, Page H, Overington D, Jeffery K (2017) An independent, landmark-  
840 dominated head-direction signal in dysgranular retrosplenial cortex. *Nat Neurosci*  
841 20:173-175.
- 842 Kealy J, Commins S (2011) The rat perirhinal cortex: A review of anatomy, physiology, plasticity,  
843 and function. *Prog Neurobiol* 93:522-548.
- 844 Keene CS, Bucci DJ (2008a) Contributions of the retrosplenial and posterior parietal cortices to  
845 cue-specific and contextual fear conditioning. *Behav Neurosci* 122:89-97.
- 846 Keene CS, Bucci DJ (2008b) Neurotoxic lesions of retrosplenial cortex disrupt signaled and  
847 unsignaled contextual fear conditioning. *Behav Neurosci* 122:1070-1077.
- 848 Kinnavane L, Amin E, Olarte-Sánchez CM, Aggleton JP (2017) Medial temporal pathways for  
849 contextual learning: Network c-fos mapping in rats with or without perirhinal cortex  
850 lesions. *Brain Neurosci Adv* 1.
- 851 Kinnison J, Padmala S, Choi JM, Pessoa L (2012) Network analysis reveals increased integration  
852 during emotional and motivational processing. *J Neurosci* 32:8361-8372.
- 853 Latora V, Marchiori M (2001) Efficient behavior of small-world networks. *Phys Rev Lett*  
854 87:198701.
- 855 Liu X, Ramirez S, Pang PT, Puryear CB, Govindarajan A, Deisseroth K, Tonegawa S (2012)  
856 Optogenetic stimulation of a hippocampal engram activates fear memory recall. *Nature*  
857 484:381-385.
- 858 Lukoyanov NV, Lukoyanova EA (2006) Retrosplenial cortex lesions impair acquisition of active  
859 avoidance while sparing fear-based emotional memory. *Behav Brain Res* 173:229-236.
- 860 Maren S (2011) Seeking a spotless mind: extinction, deconsolidation, and erasure of fear  
861 memory. *Neuron* 70:830-845.
- 862 Maslov S, Sneppen K (2002) Specificity and stability in topology of protein networks. *Science*  
863 296:910-913.
- 864 Medaglia JD, Lynall ME, Bassett DS (2015) Cognitive network neuroscience. *J Cogn Neurosci*  
865 27:1471-1491.
- 866 Medaglia JD, Chiou KS, Slocomb J, Fitzpatrick NM, Wardecker BM, Ramanathan D, Vesek J, Good  
867 DC, Hillary FG (2012) The less BOLD, the wiser: support for the latent resource  
868 hypothesis after traumatic brain injury. *Hum Brain Mapp* 33:979-993.
- 869 Mišić B, Sporns O (2016) From regions to connections and networks: new bridges between brain  
870 and behavior. *Curr Opin Neurobiol* 40:1-7.

- 871 Nadel L (2008) The Hippocampus and Context Revisited. In: Hippocampal Place Fields: Relevance  
872 to Learning and Memory (Mizumori SJY, ed), pp 3-15. New York: Oxford University Press.
- 873 Nadel L, Willner J (1980) Context and conditioning: a place for space. *Physiological Psychology*  
874 8:11.
- 875 Nelson AJ, Powell AL, Holmes JD, Vann SD, Aggleton JP (2015a) What does spatial alternation  
876 tell us about retrosplenial cortex function? *Front Behav Neurosci* 9:126.
- 877 Nelson AJ, Hindley EL, Pearce JM, Vann SD, Aggleton JP (2015b) The effect of retrosplenial cortex  
878 lesions in rats on incidental and active spatial learning. *Front Behav Neurosci* 9:11.
- 879 Paxinos G, Watson C (2007) *The Rat Brain in stereotaxic coordinates*. London, UK: Academic  
880 Press.
- 881 Petersen SE, Sporns O (2015) Brain Networks and Cognitive Architectures. *Neuron* 88:207-219.
- 882 Phillips RG, LeDoux JE (1995) Lesions of the fornix but not the entorhinal or perirhinal cortex  
883 interfere with contextual fear conditioning. *J Neurosci* 15:5308-5315.
- 884 Pothuizen HH, Aggleton JP, Vann SD (2008) Do rats with retrosplenial cortex lesions lack  
885 direction? *Eur J Neurosci* 28:2486-2498.
- 886 R CT (2013) *R: A Language and Environment for Statistical Computing*. In. Vienna, Austria: R  
887 Foundation for Statistical Computing.
- 888 Ritchey M, Libby LA, Ranganath C (2015) Cortico-hippocampal systems involved in memory and  
889 cognition: the PMAT framework. *Prog Brain Res* 219:45-64.
- 890 Robinson S, Poorman CE, Marder TJ, Bucci DJ (2012) Identification of functional circuitry  
891 between retrosplenial and postrhinal cortices during fear conditioning. *J Neurosci*  
892 32:12076-12086.
- 893 Rudy JW (2009) Context representations, context functions, and the parahippocampal-  
894 hippocampal system. *Learn Mem* 16:573-585.
- 895 Sakar D (2008) *Lattice: Multivariate Data Visualization with R*. New York: Springer.
- 896 Sato JR, Balardin J, Vidal MC, Fujita A (2016) Identification of segregated regions in the functional  
897 brain connectome of autistic patients by a combination of fuzzy spectral clustering and  
898 entropy analysis. *J Psychiatry Neurosci* 41:124-132.
- 899 Schenberg EE, Oliveira MG (2008) Effects of pre or posttraining dorsal hippocampus D-AP5  
900 injection on fear conditioning to tone, background, and foreground context.  
901 *Hippocampus* 18:1089-1093.
- 902 Sporns O, Zwi JD (2004) The small world of the cerebral cortex. *Neuroinformatics* 2:145-162.
- 903 Stanciu M, Radulovic J, Spiess J (2001) Phosphorylated cAMP response element binding protein  
904 in the mouse brain after fear conditioning: relationship to Fos production. *Brain Res Mol*  
905 *Brain Res* 94:15-24.
- 906 Sugar J, Witter MP, van Strien NM, Cappaert NL (2011) The retrosplenial cortex: intrinsic  
907 connectivity and connections with the (para)hippocampal region in the rat. An  
908 interactive connectome. *Front Neuroinform* 5:7.
- 909 Suzuki WA, Naya Y (2014) The perirhinal cortex. *Annu Rev Neurosci* 37:39-53.
- 910 Todd TP, Bucci DJ (2015) Retrosplenial Cortex and Long-Term Memory: Molecules to Behavior.  
911 *Neural Plast* 2015:414173.
- 912 Todd TP, DeAngeli NE, Jiang MY, Bucci DJ (2017) Retrograde amnesia of contextual fear  
913 conditioning: Evidence for retrosplenial cortex involvement in configural processing.  
914 *Behav Neurosci* 131:46-54.
- 915 Trifilieff P, Herry C, Vanhoutte P, Caboche J, Desmedt A, Riedel G, Mons N, Micheau J (2006)  
916 Foreground contextual fear memory consolidation requires two independent phases of  
917 hippocampal ERK/CREB activation. *Learn Mem* 13:349-358.
- 918 van den Heuvel MP, Sporns O (2013) Network hubs in the human brain. *Trends Cogn Sci* 17:683-  
919 696.
- 920 Vann SD, Aggleton JP, Maguire EA (2009) What does the retrosplenial cortex do? *Nat Rev*  
921 *Neurosci* 10:792-802.

- 922 Vetere G, Kenney JW, Tran LM, Xia F, Steadman PE, Parkinson J, Josselyn SA, Frankland PW  
923 (2017) Chemogenetic Interrogation of a Brain-wide Fear Memory Network in Mice.  
924 *Neuron* 94:363-374.e364.
- 925 Watts DJ, Strogatz SH (1998) Collective dynamics of 'small-world' networks. *Nature* 393:440-  
926 442.
- 927 Wei Tn (2013) corrplot: Visualization of a correlation matrix. In.  
928 Wheeler AL, Teixeira CM, Wang AH, Xiong X, Kovacevic N, Lerch JP, McIntosh AR, Parkinson J,  
929 Frankland PW (2013) Identification of a functional connectome for long-term fear  
930 memory in mice. *PLoS Comput Biol* 9:e1002853.
- 931 Wickham H (2009) ggplot2: Elegant Graphics for Data Analysis. In: Springer-Verlag New York.
- 932 Wiltgen BJ, Sanders MJ, Anagnostaras SG, Sage JR, Fanselow MS (2006) Context fear learning in  
933 the absence of the hippocampus. *J Neurosci* 26:5484-5491.
- 934 Winocur G, Moscovitch M, Rosenbaum RS, Sekeres M (2010) An investigation of the effects of  
935 hippocampal lesions in rats on pre- and postoperatively acquired spatial memory in a  
936 complex environment. *Hippocampus* 20:1350-1365.
- 937 Zelikowsky M, Bissiere S, Fanselow MS (2012) Contextual fear memories formed in the absence  
938 of the dorsal hippocampus decay across time. *J Neurosci* 32:3393-3397.
- 939

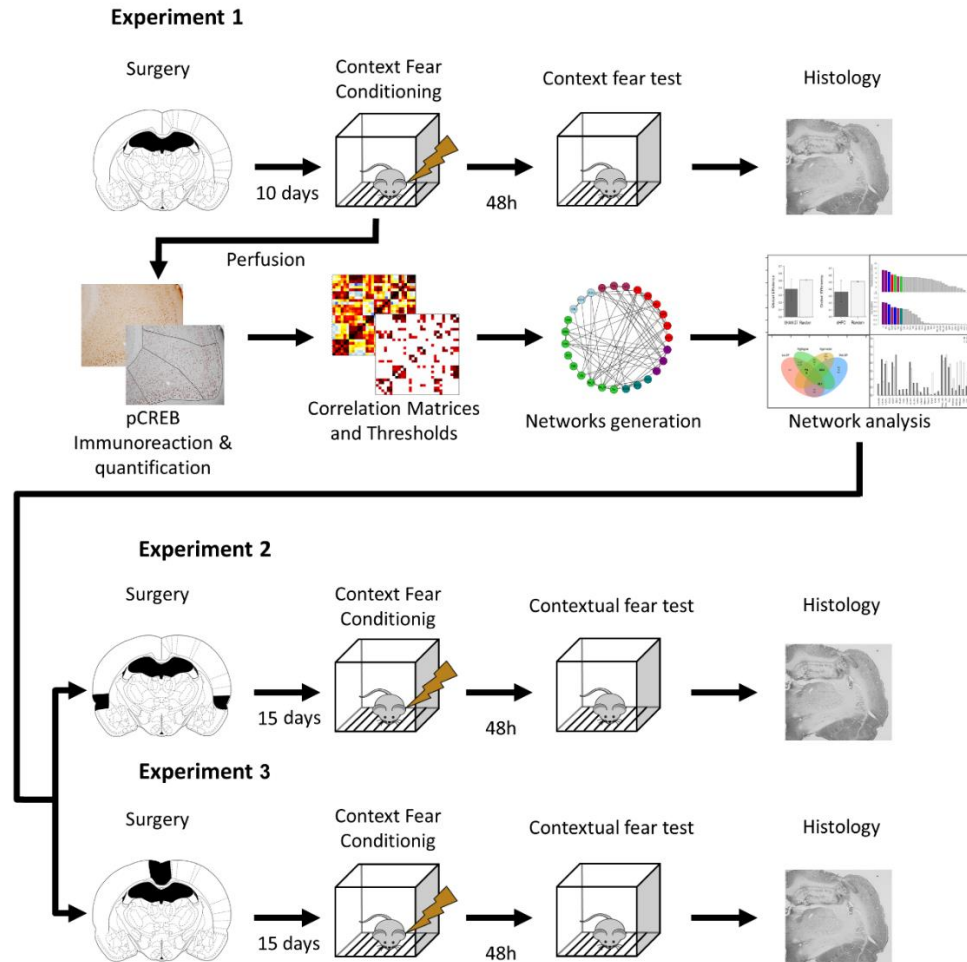

940

941 **Figure 1:** Overview of the experimental design. *In Experiment 1*, the rats underwent pre-training  
942 dHPC lesions and, after recovery, a contextual fear conditioning session. Half the sample  
943 underwent fear memory test 48 h later and half was perfused 3 hours after CFC and had their  
944 brains processed and stained for pCREB protein. Thirty regions had their pCREB expression  
945 quantified and their pCREB inter-regional correlations computed. After thresholding the  
946 correlations, we analyzed the networks properties and compared them between the groups.  
947 Following network analysis, *Experiments 2 and 3* employed double lesions to test if the network  
948 differences observed could be empirically supported.

949 **Table 1:** List of regions included in Experiment 1.

| Region                                 | Abbreviation | Reference            | Color      |
|----------------------------------------|--------------|----------------------|------------|
| <b>Amygdala Nuclei</b>                 |              |                      |            |
| Lateral nucleus, ventromedial part     | LAVM         | Atlas Paxinos        | Red        |
| Lateral nucleus, Dorsolateral part     | LADL         | Atlas Paxinos        |            |
| Lateral nucleus, Ventrolateral part    | LAVL         | Atlas Paxinos        |            |
| Basolateral nucleus, anterior part     | BLA          | Atlas Paxinos        |            |
| Basolateral nucleus, posterior part    | BLP          | Atlas Paxinos        |            |
| Basolateral nucleus, ventral part      | BLV          | Atlas Paxinos        |            |
| Central nucleus, Capsular division     | CeC          | Atlas Paxinos        |            |
| Central nucleus, Medial division       | CeM          | Atlas Paxinos        | Dark Red   |
| Central nucleus, Lateral division      | CeL          | Atlas Paxinos        |            |
| <b>Hippocampal Formation</b>           |              |                      |            |
| Dorsal CA1 (only SHAM group)           | dCA1         | Atlas Paxinos        | Blue       |
| Dorsal CA3 (only SHAM group)           | dCA3         | Atlas Paxinos        |            |
| Dorsal Dentate Gyrus (only SHAM group) | dDG          | Atlas Paxinos        |            |
| Ventral CA1                            | vCA1         | Atlas Paxinos        | Light Blue |
| Ventral CA3                            | vCA3         | Atlas Paxinos        |            |
| Ventral Dentate Gyrus                  | vDG          | Atlas Paxinos        |            |
| Ventral Subiculum                      | vSUB         | Atlas Paxinos        | Green      |
| <b>Neocortex</b>                       |              |                      |            |
| Medial Entorhinal cortex               | Ment         | Insausti et al, 1997 | Green      |
| Caudomedial Entorhinal cortex          | Cent         | Insausti et al, 1997 |            |
| Ventral Intermediary Entorhinal cortex | VIE          | Insausti et al, 1997 |            |
| Dorsal Intermediary Entorhinal cortex  | DIE          | Insausti et al, 1997 |            |
| Dorsal Lateral Entorhinal cortex       | DLE          | Insausti et al, 1997 |            |
| Perirhinal cortex, área 35             | PER_35       | Burwell, 2001        |            |
| Perirhinal cortex, área 36             | PER_36       | Burwell, 2001        |            |
| Postrhinal cortex                      | POR          | Burwell, 2001        |            |
| Anterior Cingulate cortex              | Cg1          | Atlas Paxinos        |            |
| Prelimbic cortex                       | PrL          | Atlas Paxinos        |            |
| Infralimbic cortex                     | IL           | Atlas Paxinos        | Purple     |
| Retrosplenial cortex, granular, A29ab  | RSGv         | Sugar et al, 2011    |            |
| Retrosplenial cortex, granular, A29c   | RSGd         | Sugar et al, 2011    |            |
| Retrosplenial cortex, dysgranular, A30 | RSC          | Sugar et al, 2011    | Teal       |

950

951 The columns show the name of each region, the abbreviations and the source of the anatomical  
 952 definition adopted, and the color code used in figures for each group of regions. Color code –  
 953 Red: basolateral complex of the amygdala; Dark Red: Central Amygdala nuclei; Blue: dorsal  
 954 Hippocampus; Light Blue: ventral Hippocampus; Green: parahippocampal regions; Purple:  
 955 Prefrontal cortices; Magenta: Retrosplenial cortices.

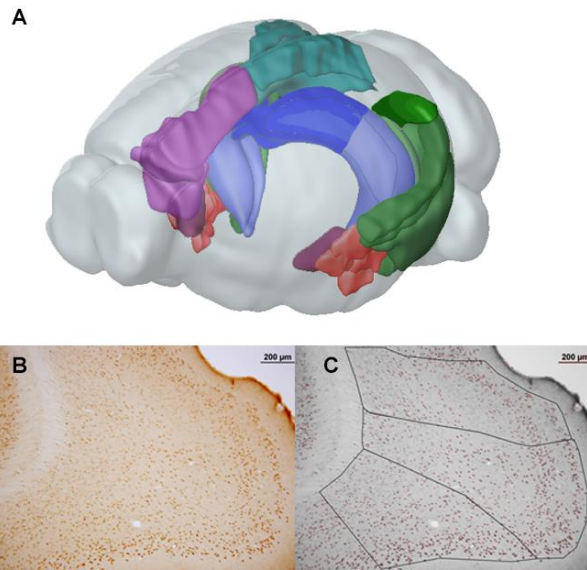

956

957 **Figure 2:** 3D diagram of a rat brain showing the regions quantified for pCREB (A). Representative  
958 photomicrograph of a pCREB immunolabelled brain slice before (B) and after (C) nuclei  
959 quantification and region parcellation by Cellprofiler. The scalebars indicate 200 µm.



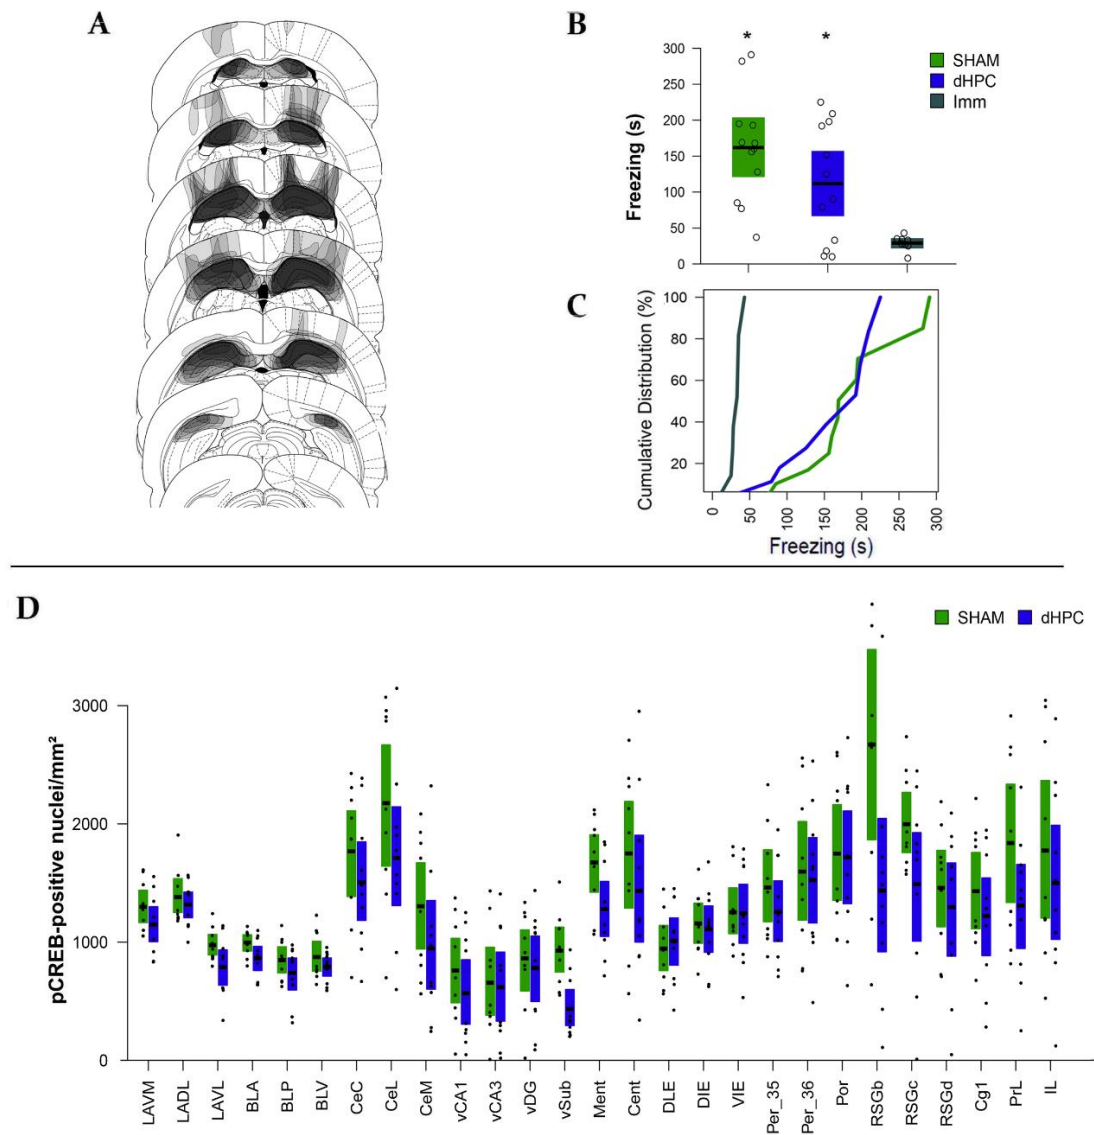

960

961 **Figure 3:** dHPC lesion does not impair CFC. (A) Schematic diagram showing the distribution of  
 962 the lesions in the dHPC group. (B) Mean (black line) and bootstrapped 95% CI of the Total  
 963 Freezing Time during the five min context fear memory test of dHPC (N = 12), SHAM (N = 12)  
 964 and Imm (N = 8) groups. The open circles show data distribution in each group. (C) Cumulative  
 965 distribution of the sample as a function of Freezing Time showing the sample distributions. The  
 966 “\*” shows a significant difference from Imm at level of  $p < 0.05$ . (D) Mean (black line) and  
 967 Bootstrapped 95% CI of the mean (boxplots) of the pCREB-positive nuclei density in each region  
 968 and each group. The black dots show the data point distributions.

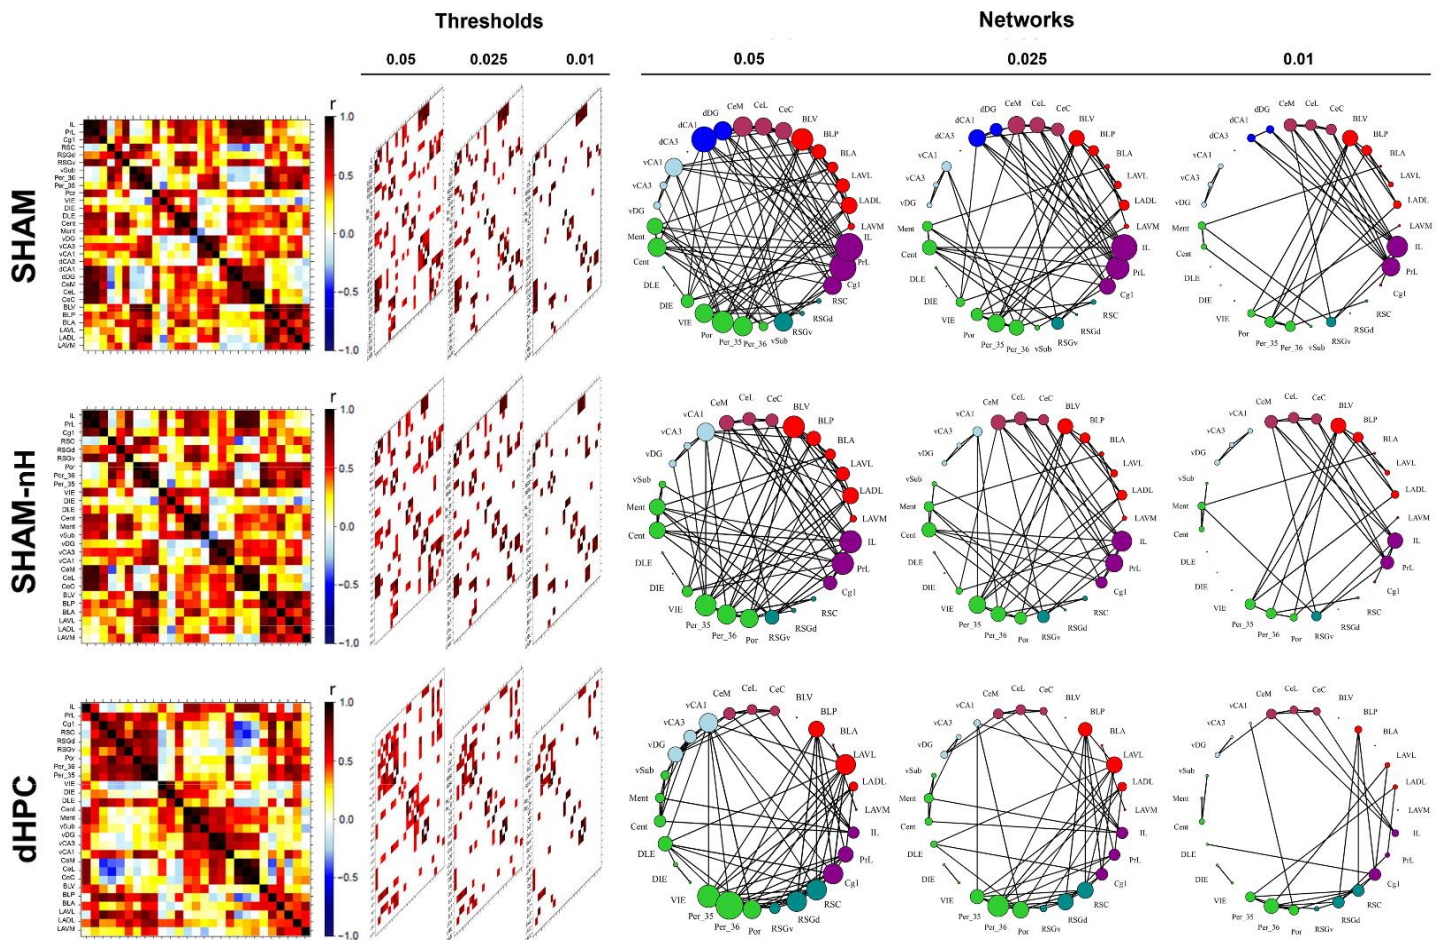

970 **Figure 4:** Generation of the connectivity networks in each group. After computing the inter-  
 971 regional correlations (left), three thresholds were applied ( $p < 0.05$ ,  $0.025$  and  $0.01$ ) and the most  
 972 robust correlation coefficients (center) composed the networks (right). Networks were generated  
 973 for SHAM (top), SHAM-nH (middle) and dHPC (bottom) matrices. In the matrices, colors reflect  
 974 correlation strength (scale, right). In the network, the colors of the nodes are coded according to  
 975 the **Table 1**, and the sizes of the nodes represent their degree (number of connections).

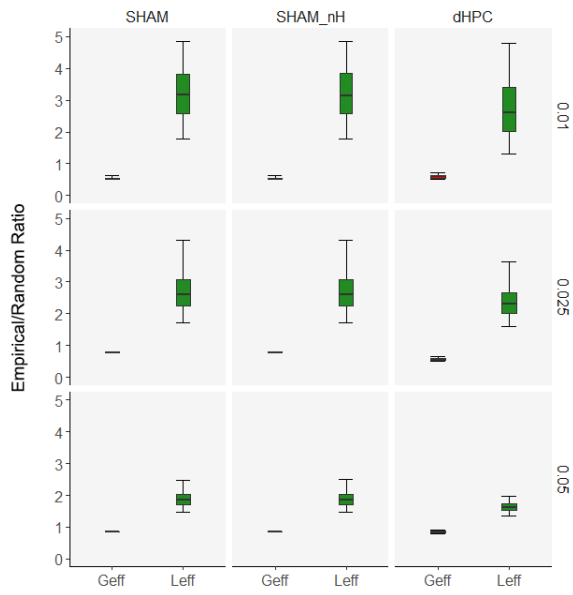

976

977 **Figure 5:** dHPC damage does not alter the CFC learning network small-worldness. Boxplots  
978 showing mean, lower and upper quartiles, and 95% CIs of the Empirical/Random Ratio of Geff  
979 and Leff for the SHAM (left), SHAM-nH (center) and dHPC (right) networks and on the  
980 0.05(bottom), 0.025 (center) and 0.01(top) thresholds. Small-world networks are expected to have  
981 Geff ratios around 1 (empirical and randomized networks have roughly the same values) and  
982 higher Leff ratios (higher empirical values than those of the randomized networks).

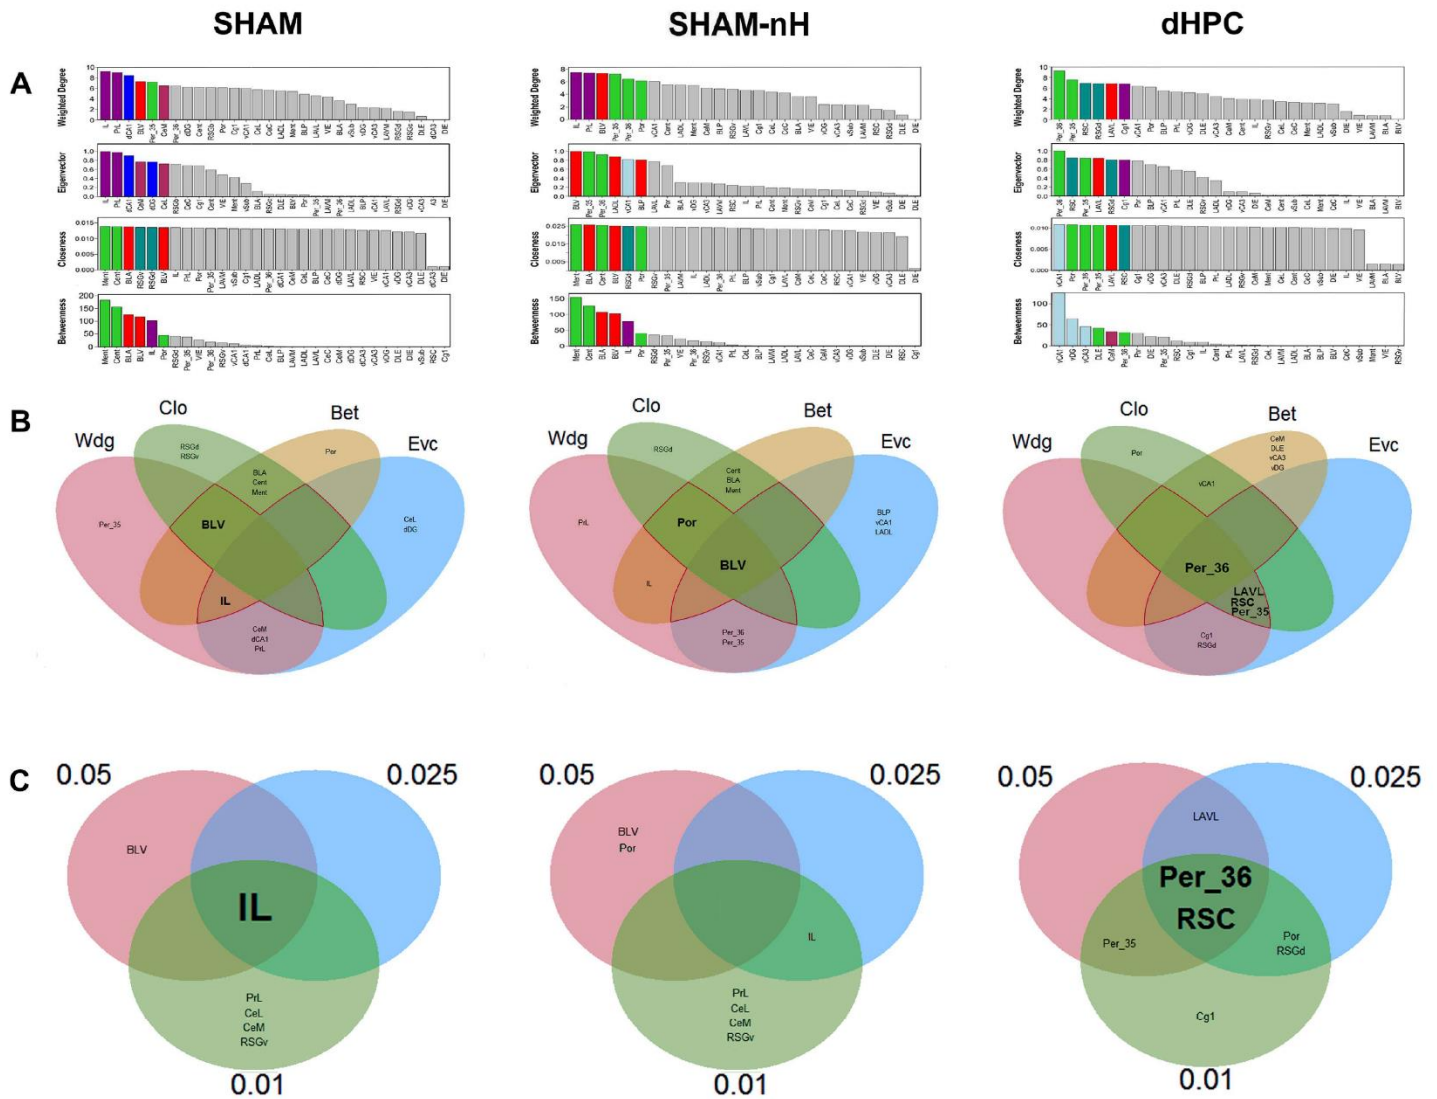

984 **Figure 6:** Hub identification of the networks. (A) The rankings of each centrality are shown for the  
 985 (left) SHAM, (center) SHAM-nH and (right) dHPC networks under the 0.05 threshold. The colored  
 986 nodes are the upper 25% most central in each metric. (B) The intersections of the upper 25%  
 987 most central regions of each metric are shown for each network under the 0.05 threshold. Any  
 988 region within the overlapping area of at least three metrics was considered a network hub (inside  
 989 the red perimeter). The hubs were identified in the 0.025 and 0.01 threshold networks as well,  
 990 and the hubs of each threshold were intersected (C) to verify the stability of the hub identification  
 991 throughout the thresholds. Nodes are colored according to the code in **Table 1**.

992 **Table 2: Centrality Comparison between SHAM-nH and dHPC networks.**

|        | 0.05   |        |        |        | 0.025  |        |        |        | 0.01   |        |        |        |
|--------|--------|--------|--------|--------|--------|--------|--------|--------|--------|--------|--------|--------|
|        | Wdg    | Evc    | Clo    | Bet    | Wdg    | Evc    | Clo    | Bet    | Wdg    | Evc    | Clo    | Bet    |
| LAVM   | 0.2943 | 0.1077 | 0.6353 | 0.7733 | 0.2893 | 0.5256 | 0.3666 | 0.0039 | 0.2019 | 0.2508 | 0.1355 | 1.0000 |
| LADL   | 0.2210 | 0.0304 | 0.7423 | 0.8304 | 0.7016 | 0.0802 | 0.4052 | 0.7360 | 0.2547 | 0.1545 | 0.1666 | 0.1226 |
| LAVL   | 0.3715 | 0.6279 | 0.7660 | 0.9015 | 0.1228 | 0.0155 | 0.4176 | 0.7357 | 0.8251 | 0.0831 | 0.1722 | 1.0000 |
| BLA    | 0.1983 | 0.0844 | 0.6558 | 0.0314 | 0.3969 | 0.3737 | 0.3764 | 0.0146 | 0.2398 | 0.3772 | 0.1456 | 1.0000 |
| BLP    | 0.8330 | 0.4279 | 0.7503 | 0.9500 | 0.4758 | 0.0214 | 0.4161 | 0.8981 | 0.3963 | 0.0728 | 0.1804 | 0.4444 |
| BLV    | 0.0247 | 0.0001 | 0.6617 | 0.0180 | 0.0371 | 0.6883 | 0.3896 | 0.1367 | 0.0081 | 0.3326 | 0.1593 | 0.0482 |
| CeC    | 0.5504 | 0.3965 | 0.7631 | 0.6283 | 0.4236 | 0.0791 | 0.4034 | 0.5262 | 0.2718 | 0.0896 | 0.1898 | 1.0000 |
| CeL    | 0.6243 | 0.3717 | 0.7659 | 0.9603 | 0.5065 | 0.0761 | 0.4039 | 0.9338 | 0.3714 | 0.1107 | 0.1901 | 1.0000 |
| CeM    | 0.6169 | 0.3369 | 0.7592 | 0.2273 | 0.2737 | 0.0608 | 0.3974 | 0.4616 | 0.3696 | 0.0419 | 0.1891 | 0.1555 |
| vCA1   | 0.8538 | 0.2397 | 0.7835 | 0.0238 | 0.4767 | 0.0839 | 0.4140 | 0.2549 | 0.3764 | 0.1778 | 0.1281 | 1.0000 |
| vCA3   | 0.3879 | 0.1898 | 0.8089 | 0.1097 | 0.8728 | 0.6306 | 0.4204 | 0.6615 | 0.3107 | 0.4872 | 0.2066 | 1.0000 |
| vDG    | 0.2080 | 0.1553 | 0.8052 | 0.1018 | 0.4958 | 0.6294 | 0.4197 | 0.5935 | 0.9430 | 0.4923 | 0.2058 | 0.1753 |
| vSub   | 0.6232 | 0.5306 | 0.7466 | 0.6393 | 0.9001 | 0.1529 | 0.3923 | 0.4696 | 0.6635 | 0.5091 | 0.1591 | 1.0000 |
| Ment   | 0.3793 | 0.3053 | 0.7472 | 0.0028 | 0.7291 | 0.1700 | 0.3848 | 0.0078 | 0.2355 | 0.2487 | 0.1623 | 0.0752 |
| Cent   | 0.4660 | 0.2796 | 0.7394 | 0.0086 | 0.2232 | 0.0487 | 0.3836 | 0.0118 | 0.9624 | 0.4101 | 0.1597 | 0.1925 |
| DLE    | 0.0387 | 0.0304 | 0.8523 | 0.1882 | 0.2196 | 0.1065 | 0.4234 | 0.4952 | 0.2382 | 0.1103 | 0.0566 | 1.0000 |
| DIE    | 0.1495 | 0.4349 | 0.8349 | 0.3036 | 0.1865 | 0.5832 | 0.9398 | 0.4403 | 0.0961 | 0.4487 | 0.1195 | 1.0000 |
| VIE    | 0.1654 | 0.2881 | 0.8074 | 0.3417 | 0.2527 | 0.1057 | 0.4093 | 0.3023 | 0.2648 | 0.5224 | 0.1593 | 1.0000 |
| Per_35 | 0.8360 | 0.3149 | 0.7539 | 0.7491 | 0.5330 | 0.0816 | 0.4107 | 0.8274 | 0.7152 | 0.0870 | 0.1796 | 0.2965 |
| Per_36 | 0.1635 | 0.4930 | 0.7516 | 0.6756 | 0.1786 | 0.0200 | 0.3980 | 0.1187 | 0.1850 | 0.0453 | 0.1771 | 0.3251 |
| Por    | 0.9951 | 0.5611 | 0.7315 | 0.5671 | 0.3084 | 0.0213 | 0.3751 | 0.0036 | 0.3161 | 0.0554 | 0.1693 | 0.1963 |
| RSGv   | 0.5753 | 0.2276 | 0.7451 | 0.4060 | 0.3403 | 0.1777 | 0.3923 | 0.3584 | 0.2301 | 0.2210 | 0.2157 | 0.0213 |
| RSGd   | 0.0570 | 0.0056 | 0.7404 | 0.3056 | 0.0434 | 0.0134 | 0.4072 | 0.8319 | 0.0240 | 0.0294 | 0.1178 | 0.0587 |
| RSC    | 0.0123 | 0.0236 | 0.7635 | 0.5285 | 0.0304 | 0.0103 | 0.3886 | 0.6506 | 0.0274 | 0.0183 | 0.1472 | 0.0623 |
| Cg1    | 0.4810 | 0.0122 | 0.7596 | 0.7007 | 0.9207 | 0.8064 | 0.4029 | 0.7327 | 0.0681 | 0.0917 | 0.2090 | 0.0679 |
| PrL    | 0.4430 | 0.1463 | 0.7629 | 0.9715 | 0.3466 | 0.1055 | 0.4049 | 0.9451 | 0.1401 | 0.0202 | 0.2185 | 0.3259 |
| IL     | 0.1346 | 0.2449 | 0.7533 | 0.1295 | 0.1330 | 0.0077 | 0.3939 | 0.1288 | 0.0598 | 0.0106 | 0.1898 | 0.2641 |

993

994 The comparison is done for each region, centrality metric and threshold. Values in each cell show  
 995 the permutation test p-value for each comparison. Green dots show significantly higher values in  
 996 SHAM-nH, and blue dots show significantly higher values in dHPC ( $p < 0.05$ ). In each threshold,  
 997 green lines indicate SHAM-nH network hubs for that threshold, and blue lines indicate dHPC  
 998 network hubs. Values with lines and dots in the same color show hubs associated with significant  
 999 difference. Wdg: Weighted Degree; Evc: Eigenvector; Clo: Closeness; Bet: Betweenness.

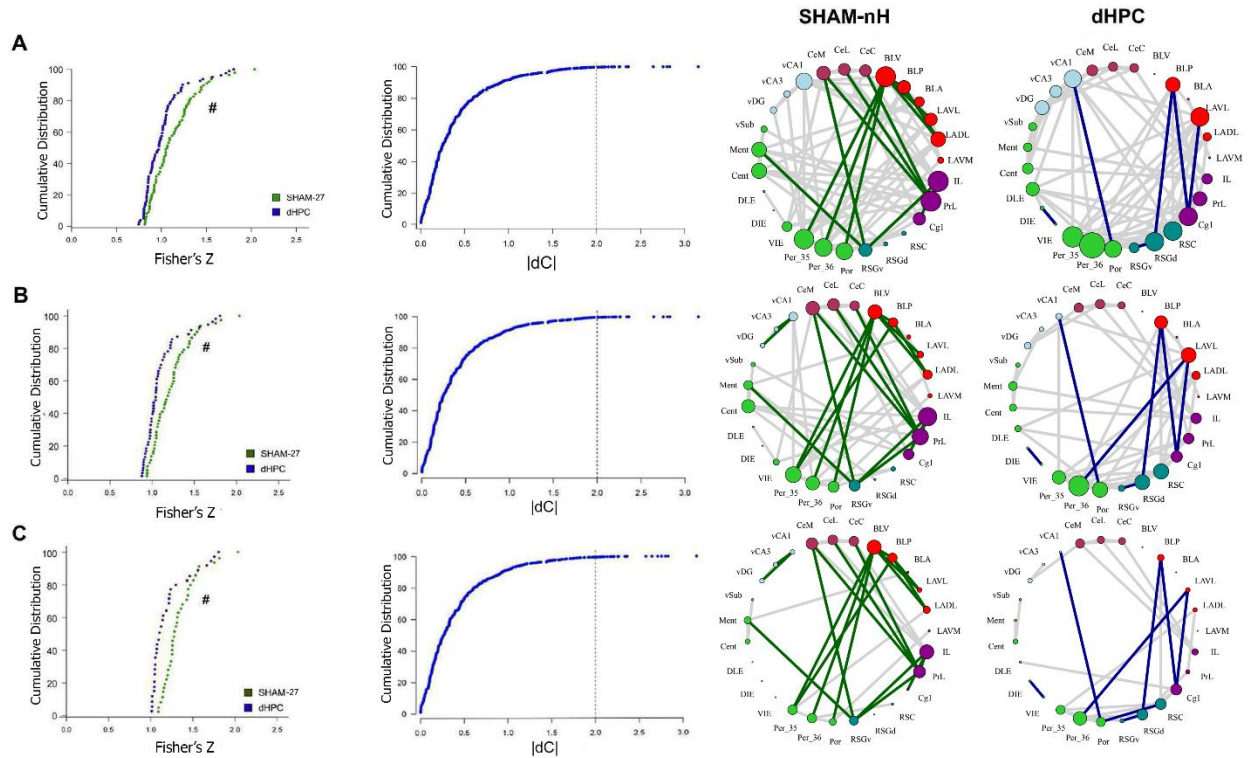

1000

1001 **Figure 7:** Connectivity Change in dHPC network. (A) Cumulative distributions of the Fisher's Z  
 1002 transformed correlation coefficients from the SHAM-nH and dHPC matrices. The “#” indicates that  
 1003 these distributions are significantly different (Kolmogorov-Smirnov test,  $p < 0.05$ ). (B) Cumulative  
 1004 distribution showing the z-score of the correlation coefficient differences between the groups in  
 1005 each cell. The dashed line shows the absolute Z score of 2, revealing the values considered  
 1006 significant (beyond it) at the level of  $\alpha = 0.05$ . Next, (C) the significantly different coefficients were  
 1007 plotted in each network, showing the network and nodes to which it belonged. The same  
 1008 procedure was performed in the 0.025 (D) and 0.01 (E) threshold networks, with similar results.

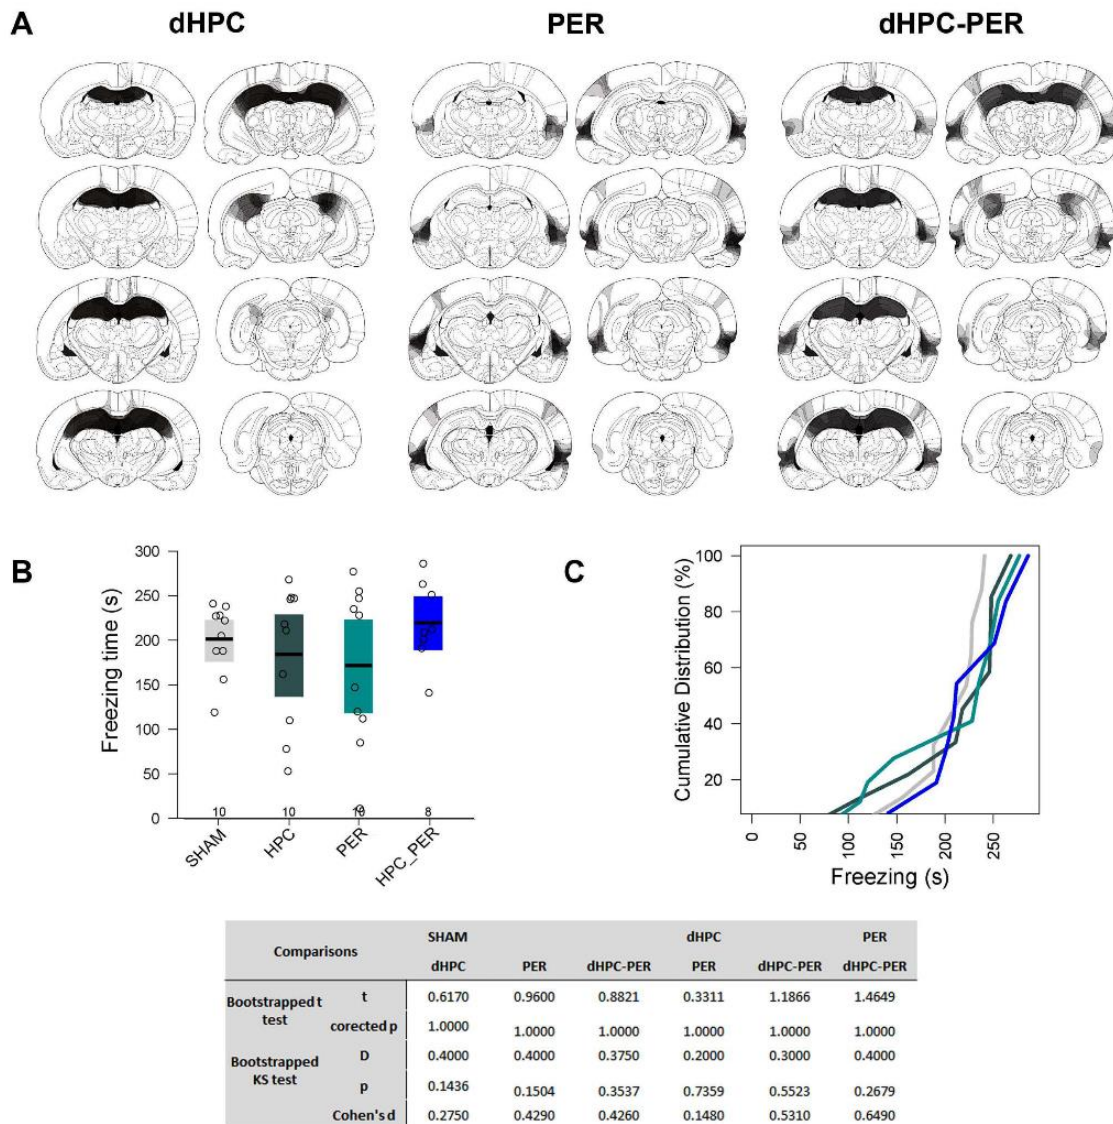

1009

1010 **Figure 8:** Per and dHPC-Per lesions on CFC learning. (A) Histological diagrams showing the  
 1011 distribution of areas damaged in dHPC, Per and dHPC-Per groups. The more overlapped the  
 1012 damaged areas across subjects, the darker the area. Mean and bootstrapped 95% IC of the total  
 1013 freezing time in SHAM, dHPC, Per and dHPC-Per groups during 5 min of CFC memory test. Dots  
 1014 show the sample distribution of each group. (C) Cumulative distribution of the total freezing time  
 1015 in each group in the same CFC memory test. The bottom table shows all the statistical tests  
 1016 performed and the corrected p-value for each comparison.

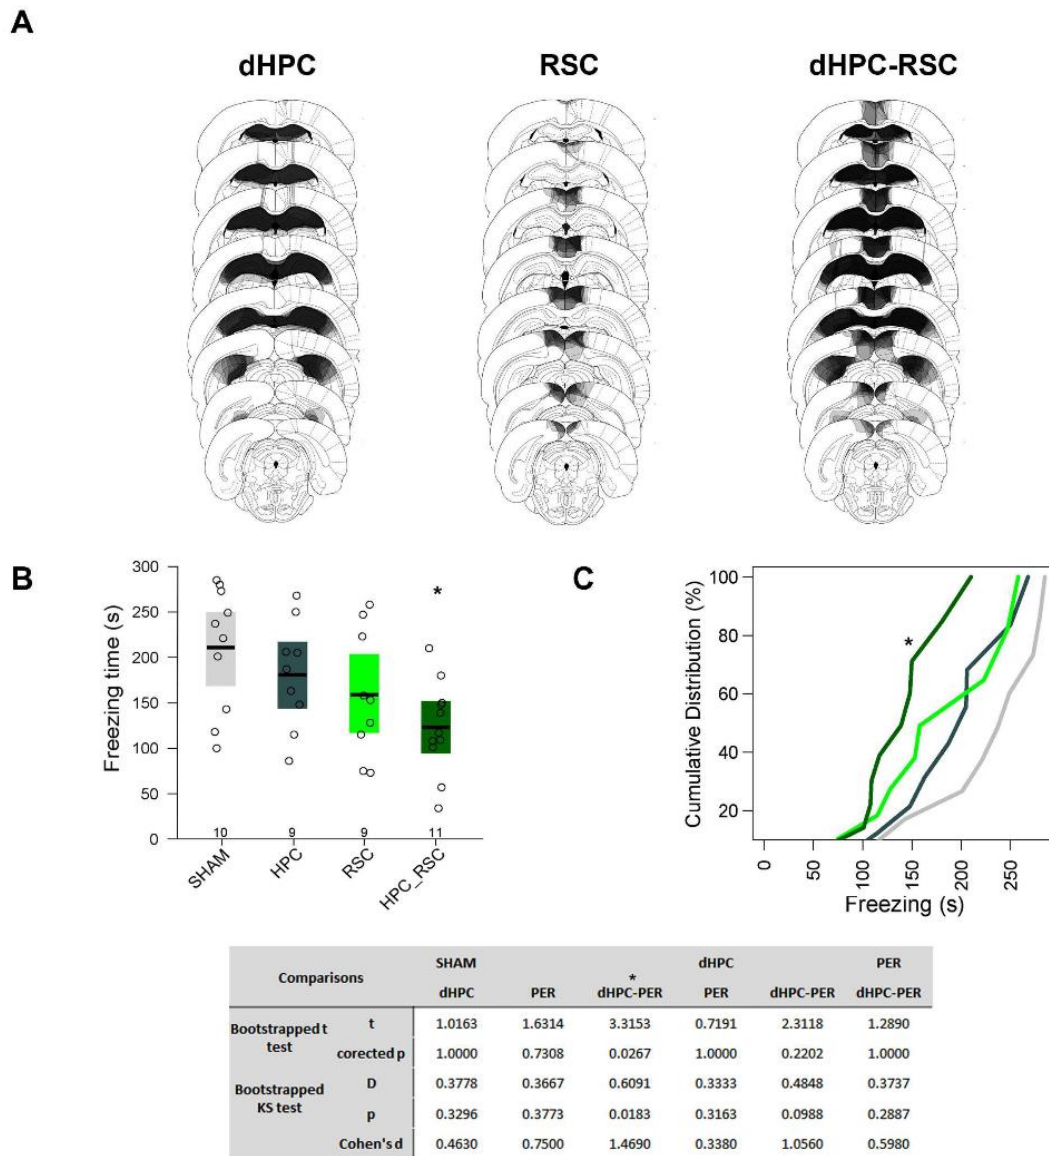

1017

1018 **Figure 9:** RSC and dHPC-RSC lesions on CFC learning. (A) Histological diagrams showing the  
 1019 distribution of areas damaged in dHPC, RSC and dHPC-RSC groups. The more overlapped the  
 1020 damaged areas across subjects, the darker the area. Mean and bootstrapped 95% IC of the total  
 1021 freezing time in SHAM, dHPC, RSC and dHPC-RSC groups during 5 min of CFC memory test.  
 1022 Dots show the sample distribution of each group. (C) Cumulative distribution of the total freezing  
 1023 time in each group in the same CFC memory test. The bottom table shows all the statistical tests  
 1024 performed and the corrected p-value for each comparison. “\*” shows significant differences  
 1025 relative to SHAM group (corrected-p <0.05).
